# Supplementary material for: STRICTA: is it time to do more?
Source: PubMed Central journal article supplement (PMC4474462; doi:10.1186/s12906-015-0714-4), 2015-06-20
Supplement: 12906_2015_714_MOESM1_ESM.pdf [file 12906_2015_714_MOESM1_ESM.pdf]

**Table S1. Characteristics of articles cited STRICTA 2002**

| Publication year                                          | Author(s)              | Article title                                                                                                                  | Study type                               | Journal name                                      | Journal type |
|-----------------------------------------------------------|------------------------|--------------------------------------------------------------------------------------------------------------------------------|------------------------------------------|---------------------------------------------------|--------------|
| <i>From English databases (Web of Science and Scopus)</i> |                        |                                                                                                                                |                                          |                                                   |              |
| 2002                                                      | Niemtzow               | Acupuncture in the twenty-first century                                                                                        | Editorial                                | Journal of Alternative and Complementary Medicine | 3            |
| 2002                                                      | Webster-Harrison et al | Acupuncture for tennis elbow: An e-mail consensus study to define a standardised treatment in a GPs' surgery                   | Delphi study                             | Acupuncture in Medicine                           | 3            |
| 2003                                                      | Anastasi and McMahon   | Testing strategies to reduce diarrhea in persons with HIV using traditional Chinese medicine: Acupuncture and moxibustion      | Observational study                      | Journal of the Association of Nurses in AIDS Care | 2            |
| 2003                                                      | Birch                  | Overview of models used in controlled acupuncture studies and thoughts about questions answerable by each                      | Review: research methodology discussions | Clinical Acupuncture and Oriental Medicine        | 4            |
| 2003                                                      | Dusek et al            | Healing prayer outcomes studies: Consensus recommendations                                                                     | Recommendations                          | Alternative Therapies in Health and Medicine      | 4            |
| 2003                                                      | Hammerschlag           | Acupuncture: On what should its evidence base be based?                                                                        | Commentary                               | Alternative Therapies in Health and Medicine      | 4            |
| 2003                                                      | Streitberger et al     | Quality standards for randomised controlled acupuncture trials (Article in German)                                             | Review: research methodology discussions | Deutsche Zeitschrift für Akupunktur               | 3            |
| 2003                                                      | Usichenko and Pavlovic | Suggesting the optimal control procedure for acupressure studies                                                               | Letter                                   | Anesthesia and Analgesia                          | 2            |
| 2003                                                      | White and Ernst        | Pitfalls in conducting systematic reviews of acupuncture                                                                       | Letter                                   | Rheumatology                                      | 2            |
| 2003                                                      | Wiebrecht              | Recommendations of the standards for reporting interventions in controlled trials of acupuncture (STRICTA) (Article in German) | Recommendations                          | Deutsche Zeitschrift für Akupunktur               | 3            |
| 2003                                                      | Zijlstra et al         | Anti-inflammatory actions of acupuncture                                                                                       | Review                                   | Mediators of Inflammation                         | 2            |

|      |                   |                                                                                                                           |                                          |                                                               |          |
|------|-------------------|---------------------------------------------------------------------------------------------------------------------------|------------------------------------------|---------------------------------------------------------------|----------|
| 2004 | Audette and Ryan  | The role of acupuncture in pain management                                                                                | Review                                   | Physical Medicine and Rehabilitation Clinics of North America | 2        |
| 2004 | Birch             | Clinical research on acupuncture: Part 2. Controlled clinical trials, an overview of their methods                        | Review: research methodology discussions | Journal of Alternative and Complementary Medicine             | 3        |
| 2004 | Cardini           | Acupuncture: Scientific evidence                                                                                          | Review                                   | Evidenze scientifiche in agopuntura                           | 4        |
| 2004 | Long et al        | Original research published in the chiropractic literature: Evaluation of the research report                             | Review: research methodology discussions | Journal of Manipulative and Physiological Therapeutics        | 2        |
| 2004 | MacPherson        | Pragmatic clinical trials                                                                                                 | General article: expert opinion          | Complementary Therapies in Medicine                           | 3 (2002) |
| 2004 | McCarney et al    | An overview of two Cochrane systematic reviews of complementary treatments for chronic asthma: Acupuncture and homeopathy | Review                                   | Respiratory Medicine                                          | 2        |
| 2004 | Peuker and Filler | Guidelines for case reports of adverse events related to acupuncture                                                      | Guidelines                               | Acupuncture in Medicine                                       | 3        |
| 2004 | Rogenhofer et al  | Acupuncture for pain in extracorporeal shockwave lithotripsy                                                              | Observational study                      | Journal of Endourology                                        | 2        |
| 2004 | Veal              | Countering misleading information                                                                                         | Review: research methodology discussions | Complementary Therapies in Nursing and Midwifery              | 4        |
| 2004 | White             | Writing case reports - Author guidelines for Acupuncture in Medicine                                                      | Guidelines                               | Acupuncture in Medicine                                       | 3        |
| 2004 | White             | Methodological concerns when designing trials for the efficacy of acupuncture for the treatment of pain                   | Review: research methodology discussions | Complementary and Alternative Approaches to Biomedicine       | 4        |
| 2005 | Altman            | The development of the CONSORT explanatory document                                                                       | Guidelines related                       | Chinese Journal of Evidence-Based Medicine                    | 1        |
| 2005 | Altman and Moher  | Developing guidelines for reporting healthcare research: Scientific rationale and procedures                              | Guidelines related                       | Medicina Clinica                                              | 1        |

|      |                     |                                                                                                                                 |                                          |                                                          |    |
|------|---------------------|---------------------------------------------------------------------------------------------------------------------------------|------------------------------------------|----------------------------------------------------------|----|
| 2005 | Baldry and Thompson | Acupuncture, Trigger Points and Musculoskeletal Pain                                                                            | Book                                     | Publisher: Elsevier Ltd                                  | NA |
| 2005 | Castro              | Integrating acupuncture in the physical medicine and rehabilitation setting                                                     | Review                                   | Critical Reviews in Physical and Rehabilitation Medicine | 2  |
| 2005 | Furlan et al        | Acupuncture and dry-needling for low back pain: An updated systematic review within the framework of the Cochrane Collaboration | Review                                   | Spine                                                    | 2  |
| 2005 | Furlan et al        | Acupuncture and dry-needling for low back pain                                                                                  | Review                                   | Cochrane Database of Systematic Reviews                  | 1  |
| 2005 | Herman et al        | Is complementary and alternative medicine (CAM) cost-effective? A systematic review                                             | Review                                   | BMC Complementary and Alternative Medicine               | 4  |
| 2005 | Jedel               | Acupuncture in xerostomia - A systematic review                                                                                 | Review                                   | Journal of Oral Rehabilitation                           | 2  |
| 2005 | Johnston et al      | Incorporating acupuncture into oncologic practice: How clinical need shapes physician acceptance                                | Commentary                               | Journal of Cancer Integrative Medicine                   | 2  |
| 2005 | Lechleitner et al   | Feasibility and acceptance of acupuncture treatment in a Department of Internal Medicine (Article in German)                    | Observational study                      | Deutsche Zeitschrift für Akupunktur                      | 3  |
| 2005 | Melchart et al      | The acupuncture randomised trial (ART) for tension-type headache - Details of the treatment                                     | RCT                                      | Acupuncture in Medicine                                  | 3  |
| 2005 | Mills et al         | An analysis of general medical and specialist journals that endorse CONSORT found that reporting was not enforced consistently  | Review: research methodology discussions | Journal of Clinical Epidemiology                         | 1  |
| 2005 | Mills et al         | The quality of randomized trial reporting in leading medical journals since the revised CONSORT statement                       | Review: research methodology discussions | Contemporary Clinical Trials                             | 1  |
| 2005 | Rathbone and Xia    | Acupuncture for schizophrenia                                                                                                   | Review                                   | Cochrane Database of Systematic Reviews                  | 1  |
| 2005 | Smith and Hay       | Acupuncture for depression                                                                                                      | Review                                   | Cochrane Database of Systematic Reviews                  | 1  |
| 2005 | Thomas et al        | Longer term clinical and economic benefits of offering acupuncture care to patients with chronic low back pain                  | RCT                                      | Health Technology Assessment                             | 1  |

|      |                   |                                                                                                                             |                                          |                                                       |   |
|------|-------------------|-----------------------------------------------------------------------------------------------------------------------------|------------------------------------------|-------------------------------------------------------|---|
| 2005 | Usichenko et al   | Auricular acupuncture for pain relief after total hip arthroplasty - A randomized controlled study                          | RCT                                      | Pain                                                  | 2 |
| 2005 | Usichenko et al   | Auricular acupuncture for pain relief after ambulatory knee arthroscopy - A pilot study                                     | RCT                                      | Evidence-based Complementary and Alternative Medicine | 4 |
| 2005 | White             | Conducting and reporting case series and audits - Author guidelines for Acupuncture in Medicine                             | Guidelines                               | Acupuncture in Medicine                               | 3 |
| 2006 | Allen et al       | Acupuncture for depression: A randomized controlled trial                                                                   | RCT                                      | Journal of Clinical Psychiatry                        | 2 |
| 2006 | Brinkhaus et al   | Interventions and physician characteristics in a randomized multicenter trial of acupuncture in patients with low-back pain | RCT                                      | Journal of Alternative and Complementary Medicine     | 3 |
| 2006 | Dean et al        | Reporting Data on Homeopathic Treatments (RedHot): A supplement to CONSORT                                                  | Guideline                                | Forschende Komplementarmedizin                        | 4 |
| 2006 | Gagnier et al     | Recommendations for reporting randomized controlled trials of herbal interventions: explanation and elaboration             | Recommendations                          | Journal of Clinical Epidemiology                      | 2 |
| 2006 | Griggs and Jensen | Effectiveness of acupuncture for migraine: Critical literature review                                                       | Review                                   | Journal of Advanced Nursing                           | 2 |
| 2006 | Highfield et al   | Adolescent endometriosis-related pelvic pain treated with acupuncture: Two case reports                                     | Case report                              | Journal of Alternative and Complementary Medicine     | 3 |
| 2006 | Johnson           | The clinical effectiveness of acupuncture for pain relief - You can be certain of uncertainty                               | Review                                   | Acupuncture in Medicine                               | 3 |
| 2006 | Kessler et al     | A study to compare the effects of massage and static touch on experimentally induced pain in healthy volunteers             | Observational study                      | Physiotherapy                                         | 2 |
| 2006 | Lee and Chan      | Acupuncture and anaesthesia                                                                                                 | Review                                   | Best Practice and Research: Clinical Anaesthesiology  | 2 |
| 2006 | Lee et al         | Acupuncture for smoking cessation?: Commentary                                                                              | Commentary                               | Yonsei Medical Journal                                | 1 |
| 2006 | Lewis and Johnson | The clinical effectiveness of therapeutic massage for musculoskeletal pain: a systematic review                             | Review                                   | Physiotherapy                                         | 2 |
| 2006 | Lewith et al      | Developing a research strategy for acupuncture                                                                              | Review: research methodology discussions | Clinical Journal of Pain                              | 2 |

|      |                 |                                                                                                                                                  |                                          |                                                              |   |
|------|-----------------|--------------------------------------------------------------------------------------------------------------------------------------------------|------------------------------------------|--------------------------------------------------------------|---|
| 2006 | Lim et al       | Acupuncture for treatment of irritable bowel syndrome                                                                                            | Review                                   | Cochrane Database of Systematic Reviews                      | 1 |
| 2006 | Linde et al     | Treatment in a randomized multicenter trial of acupuncture for migraine (ART migraine)                                                           | RCT                                      | Forschende Komplementarmedizin und Klassische Naturheilkunde | 4 |
| 2006 | Peters          | Letter to the editor                                                                                                                             | Letter                                   | Journal of Bodywork and Movement Therapies                   | 2 |
| 2006 | Price et al     | Acupuncture care for breast cancer patients during chemotherapy: A feasibility study                                                             | Protocol                                 | Integrative Cancer Therapies                                 | 2 |
| 2006 | Shea            | Applying evidence-based medicine to traditional Chinese medicine: Debate and strategy                                                            | Review: research methodology discussions | Journal of Alternative and Complementary Medicine            | 3 |
| 2006 | Smith et al     | Complementary and alternative therapies for pain management in labour                                                                            | Review                                   | Cochrane Database of Systematic Reviews                      | 1 |
| 2006 | Usichenko et al | Auricular acupuncture reduces intraoperative fentanyl requirement during hip arthroplasty - A randomized double-blinded study                    | RCT                                      | Acupuncture and Electro-Therapeutics Research                | 4 |
| 2006 | Walji and Boon  | Redefining the randomized controlled trial in the context of acupuncture research                                                                | Review: research methodology discussions | Complementary Therapies in Clinical Practice                 | 4 |
| 2006 | Wu et al        | Acupuncture for stroke rehabilitation                                                                                                            | Review                                   | Cochrane Database of Systematic Reviews                      | 1 |
| 2006 | Zhang et al     | Assessing the reporting quality of randomized controlled trials on acupuncture for acute ischemic stroke using the CONSORT statement and STRICTA | Review: research methodology discussions | Chinese Journal of Evidence-Based Medicine                   | 1 |
| 2007 | Anderson et al  | In vitro fertilization and acupuncture: Clinical efficacy and mechanistic basis                                                                  | Review                                   | Alternative Therapies in Health and Medicine                 | 4 |
| 2007 | Banzer et al    | Acute effects of needle acupuncture on power performance during stretch-shortening cycle (Article in German)                                     | RCT                                      | Forschende Komplementarmedizin                               | 4 |
| 2007 | Barlas          | Is all temporomandibular joint pain trigger point related and can acupuncture really help? Commentary                                            | Commentary                               | Focus on Alternative and Complementary Therapies             | 4 |

|      |                       |                                                                                                                                                             |                                          |                                                   |          |
|------|-----------------------|-------------------------------------------------------------------------------------------------------------------------------------------------------------|------------------------------------------|---------------------------------------------------|----------|
| 2007 | Brinkhaus             | The effect of acupuncture and probiotics in children with asthma: Commentary                                                                                | Commentary                               | Focus on Alternative and Complementary Therapies  | 4        |
| 2007 | Brinkhaus and Cabrini | Does acupuncture reduce anxiety in patients undergoing cataract surgery? Commentary                                                                         | Commentary                               | Focus on Alternative and Complementary Therapies  | 4        |
| 2007 | Brinkhaus et al       | Physician and treatment characteristics in a randomised multicentre trial of acupuncture in patients with osteoarthritis of the knee                        | RCT                                      | Complementary Therapies in Medicine               | 3 (2002) |
| 2007 | Crew et al            | Pilot study of acupuncture for the treatment of joint symptoms related to adjuvant aromatase inhibitor therapy in postmenopausal breast cancer patients     | RCT                                      | Journal of Cancer Survivorship                    | 2        |
| 2007 | Dean et al            | Reporting data on homeopathic treatments (RedHot): a supplement to CONSORT                                                                                  | Guideline                                | Homeopathy                                        | 4        |
| 2007 | Dean et al            | Reporting data on homeopathic treatments (RedHot): a supplement to CONSORT                                                                                  | Guideline                                | Journal of Alternative and Complementary Medicine | 3        |
| 2007 | Dhond et al           | Neuroimaging acupuncture effects in the human brain                                                                                                         | Review                                   | Journal of Alternative and Complementary Medicine | 3        |
| 2007 | Ezzo et al            | Massage for mechanical neck disorders: A systematic review                                                                                                  | Review                                   | Spine                                             | 2        |
| 2007 | Fassoulaki et al      | Acupressure on the extra 1 acupoint: The effect on bispectral index, serum melatonin, plasma $\beta$ -endorphin, and stress                                 | RCT                                      | Anesthesia and Analgesia                          | 2        |
| 2007 | Hansson et al         | Intramuscular and periosteal acupuncture for anxiety and sleep quality in patients with chronic musculoskeletal pain - An evaluator blind, controlled study | RCT                                      | Acupuncture in Medicine                           | 3        |
| 2007 | Harbach et al         | Minimal immunoreactive plasma $\beta$ -endorphin and decrease of cortisol at standard analgesia or different acupuncture techniques                         | RCT                                      | European Journal of Anaesthesiology               | 2        |
| 2007 | Julliard et al        | Towards a model for planning clinical research in oriental medicine                                                                                         | Review: research methodology discussions | Explore: The Journal of Science and Healing       | 1        |

|      |                        |                                                                                                                                                             |              |                                                   |          |
|------|------------------------|-------------------------------------------------------------------------------------------------------------------------------------------------------------|--------------|---------------------------------------------------|----------|
| 2007 | Kalyon                 | Acupuncture therapy (Article in Turkish)                                                                                                                    | Review       | Turkiye Fiziksel Tip ve Rehabilitasyon Dergisi    | 2        |
| 2007 | Kvist et al            | A randomised-controlled trial in Sweden of acupuncture and care interventions for the relief of inflammatory symptoms of the breast during lactation        | RCT          | Midwifery                                         | 2        |
| 2007 | Leo and Ligot          | A systematic review of randomized controlled trials of acupuncture in the treatment of depression                                                           | Review       | Journal of Affective Disorders                    | 2        |
| 2007 | Liou et al             | Broken needle in the cervical spine: A previously unreported complication of Xiaozendao acupuncture therapy                                                 | Case report  | Journal of Alternative and Complementary Medicine | 3        |
| 2007 | Lu et al               | Acupuncture for chemotherapy-induced leukopenia: Exploratory meta-analysis of randomized controlled trials                                                  | Review       | Journal of the Society for Integrative Oncology   | 2        |
| 2007 | MacPherson and Schroer | Acupuncture as a complex intervention for depression: A consensus method to develop a standardised treatment protocol for a randomised controlled trial     | Delphi study | Complementary Therapies in Medicine               | 3 (2002) |
| 2007 | Prady and MacPherson   | Assessing the utility of the Standards for Reporting Trials of Acupuncture (STRICTA): A survey of authors                                                   | Survey       | Journal of Alternative and Complementary Medicine | 3        |
| 2007 | Rosenthal and Anderson | Acupuncture and in vitro fertilisation: Recent research and clinical guidelines                                                                             | Review       | Journal of Chinese Medicine                       | 4        |
| 2007 | Selmer-Olsen et al     | Does acupuncture used in nulliparous women reduce time from prelabour rupture of membranes at term to active phase of labour? A randomised controlled trial | RCT          | Acta Obstetrica Et Gynecologica Scandinavica      | 2        |
| 2007 | Usichenko et al        | Auricular acupuncture for pain relief after ambulatory knee surgery: A randomized trial                                                                     | RCT          | Canadian Medical Association Journal              | 1        |
| 2007 | Walach                 | RedHot                                                                                                                                                      | Letter       | Contemporary Clinical Trials                      | 1        |

|      |                       |                                                                                                                                                                             |                                          |                                                       |          |
|------|-----------------------|-----------------------------------------------------------------------------------------------------------------------------------------------------------------------------|------------------------------------------|-------------------------------------------------------|----------|
| 2007 | Wang et al            | Effect of acupuncture-like electrical stimulation on chronic tension-type headache: A randomized, double-blinded, placebo-controlled trial                                  | RCT                                      | Clinical Journal of Pain                              | 2        |
| 2007 | White et al           | Standardization of nomenclature in acupuncture research (SoNAR)                                                                                                             | Recommendations                          | Evidence-based Complementary and Alternative Medicine | 4        |
| 2008 | Balk                  | Why we should change the course of acupuncture research                                                                                                                     | Review: research methodology discussions | Journal of Chinese Medicine                           | 4        |
| 2008 | Baxter et al          | Clinical effectiveness of laser acupuncture: A systematic review                                                                                                            | Review                                   | Journal of Acupuncture and Meridian Studies           | 4        |
| 2008 | Colbert et al         | Magnets applied to acupuncture points as therapy - A literature review                                                                                                      | Review                                   | Acupuncture in Medicine                               | 3        |
| 2008 | Conn et al            | Searching for the intervention in intervention research reports                                                                                                             | Review: research methodology discussions | Journal of Nursing Scholarship                        | 2        |
| 2008 | Cui et al             | Acupuncture for restless legs syndrome                                                                                                                                      | Review                                   | Cochrane Database of Systematic Reviews               | 1        |
| 2008 | Donnellan and Sharley | Comparison of the effect of two types of acupuncture on quality of life in secondary progressive multiple sclerosis: a preliminary single-blind randomized controlled trial | RCT                                      | Clinical Rehabilitation                               | 2        |
| 2008 | Ee et al              | Acupuncture for pelvic and back pain in pregnancy: a systematic review                                                                                                      | Review                                   | American Journal of Obstetrics and Gynecology         | 2        |
| 2008 | Enblom et al          | Can individuals identify if needling was performed with an acupuncture needle or a non-penetrating sham needle?                                                             | RCT                                      | Complementary Therapies in Medicine                   | 3 (2002) |
| 2008 | Fleckenstein          | A systematic review of the clinical effectiveness of acupuncture for allergic rhinitis (Article in German)                                                                  | Note                                     | Deutsche Zeitschrift für Akupunktur                   | 3        |
| 2008 | Hammerschlag et al    | Acupuncture Research                                                                                                                                                        | Book Chapter                             | Publisher: Elsevier Ltd                               | NA       |
| 2008 | Hopwood et al         | Evaluating the efficacy of acupuncture in defined aspects of stroke recovery: A randomised, placebo controlled single blind study                                           | RCT                                      | Journal of Neurology                                  | 2        |



|      |                       |                                                                                                                                                                 |                                          |                                                    |    |
|------|-----------------------|-----------------------------------------------------------------------------------------------------------------------------------------------------------------|------------------------------------------|----------------------------------------------------|----|
| 2008 | Jeon et al            | Proteomic analysis of the neuroprotective mechanisms of acupuncture treatment in a Parkinson's disease mouse model                                              | Animal studies                           | Proteomics                                         | 2  |
| 2008 | Lam et al             | Efficacy and safety of acupuncture for idiopathic Parkinson's disease: A systematic review                                                                      | Review                                   | Journal of Alternative and Complementary Medicine  | 3  |
| 2008 | Lau and Jones         | A single session of Acu-TENS increases FEV1 and reduces dyspnoea in patients with chronic obstructive pulmonary disease: A randomised, placebo-controlled trial | RCT                                      | Australian Journal of Physiotherapy                | 2  |
| 2008 | Lee                   | Acupuncture and acupressure for post-chemotherapy fatigue - We have only just begun: Commentary                                                                 | Commentary                               | Focus on Alternative and Complementary Therapies   | 4  |
| 2008 | Lee et al             | Auricular acupuncture for insomnia: A systematic review                                                                                                         | Review                                   | International Journal of Clinical Practice         | 1  |
| 2008 | Lee et al             | Acupuncture versus sham acupuncture for chronic prostatitis/chronic pelvic pain                                                                                 | RCT                                      | American Journal of Medicine                       | 1  |
| 2008 | Lu et al              | The value of acupuncture in cancer care                                                                                                                         | Review                                   | Hematology/Oncology Clinics of North America       | 2  |
| 2008 | MacPherson et al      | Developments in acupuncture research: Big-picture perspectives from the leading edge                                                                            | Conference paper                         | Journal of Alternative and Complementary Medicine  | 3  |
| 2008 | McDonough and McNeill | Acupuncture                                                                                                                                                     | Book Chapter                             | Book: Complementary Therapies for Physical Therapy | NA |
| 2008 | Molsberger et al      | Chinese acupuncture for chronic low back pain: An international expert survey                                                                                   | Survey                                   | Journal of Alternative and Complementary Medicine  | 3  |
| 2008 | Myers et al           | Massage modalities and symptoms reported by cancer patients: Narrative review                                                                                   | Review                                   | Journal of the Society for Integrative Oncology    | 2  |
| 2008 | Prady et al           | A systematic evaluation of the impact of STRICTA and CONSORT recommendations on quality of reporting for acupuncture trials                                     | Review: research methodology discussions | PLoS ONE                                           | 1  |
| 2008 | Reider                | Acronyms and anachronisms                                                                                                                                       | Editorial                                | American Journal of Sports Medicine                | 2  |

|      |                                |                                                                                                                                 |                                          |                                                   |   |
|------|--------------------------------|---------------------------------------------------------------------------------------------------------------------------------|------------------------------------------|---------------------------------------------------|---|
| 2008 | Rooney                         | Acupuncture in the treatment of non-specific low back pain in an adult population: A review of the evidence                     | Review                                   | Internet Journal of Advanced Nursing Practice     | 2 |
| 2008 | Sagar                          | Acupuncture as an evidence-based option for symptom control in cancer patients                                                  | Review                                   | Current Treatment Options in Oncology             | 2 |
| 2008 | Sagar and Wong                 | Research and regulatory issues for integrative oncology                                                                         | Review: research methodology discussions | Current Oncology                                  | 2 |
| 2008 | Simera et al                   | Guidelines for reporting health research: The EQUATOR network's survey of guideline authors                                     | Survey                                   | PLoS Medicine                                     | 3 |
| 2008 | Stener-Victorin et al          | Acupuncture in polycystic ovary syndrome: Current experimental and clinical evidence                                            | Review                                   | Journal of Neuroendocrinology                     | 2 |
| 2008 | Stener-Victorin and Von Hagens | Acupuncture in assisted reproductive technology and PCOS                                                                        | Review                                   | Gynakologische Endokrinologie                     | 2 |
| 2008 | Usichenko                      | Pain treatment with methods of complementary medicine                                                                           | Conference paper                         | Journal fur Anästhesie und Intensivbehandlung     | 2 |
| 2008 | Wang et al                     | Acupuncture for pain relief in patients with rheumatoid arthritis: A systematic review                                          | Review                                   | Arthritis & Rheumatism-Arthritis Care & Research  | 2 |
| 2008 | Wayne et al                    | Increasing research capacity at the New England School of Acupuncture through faculty and student research training initiatives | General article: education columns       | Alternative Therapies in Health and Medicine      | 4 |
| 2008 | Wayne and Kaptchuk             | Challenges inherent to t'ai chi research: Part II - Defining the intervention and optimal study design                          | Review: research methodology discussions | Journal of Alternative and Complementary Medicine | 3 |
| 2008 | White et al                    | Defining an adequate dose of acupuncture using a neurophysiological approach - A narrative review of the literature             | Review                                   | Acupuncture in Medicine                           | 3 |
| 2008 | Xie et al                      | Acupuncture for dysphagia in acute stroke                                                                                       | Review                                   | Cochrane Database of Systematic Reviews           | 1 |
| 2008 | Yeh                            | Commentary on the Cochrane review of Tai Chi for rheumatoid arthritis                                                           | Commentary                               | Explore: The Journal of Science and Healing       | 1 |

|      |                           |                                                                                                                                               |                     |                                                               |          |
|------|---------------------------|-----------------------------------------------------------------------------------------------------------------------------------------------|---------------------|---------------------------------------------------------------|----------|
| 2008 | Yuan et al                | Treatment regimens of acupuncture for low back pain-A systematic review                                                                       | Review              | Complementary Therapies in Medicine                           | 3 (2002) |
| 2008 | Yuan et al                | Effectiveness of acupuncture for low back pain: A systematic review                                                                           | Review              | Spine                                                         | 2        |
| 2008 | Zheng et al               | The effect of electroacupuncture on opioid-like medication consumption by chronic pain patients: A pilot randomized controlled clinical trial | RCT                 | European Journal of Pain                                      | 2        |
| 2009 | Anastasi et al            | Symptom management for irritable bowel syndrome: A pilot randomized controlled trial of acupuncture/moxibustion                               | RCT                 | Gastroenterology Nursing                                      | 2        |
| 2009 | Andrade and Radhakrishnan | Prayer and healing: A medical and scientific perspective on randomized controlled trials                                                      | Review              | Indian Journal of Psychiatry                                  | 2        |
| 2009 | Bai et al                 | Spatiotemporal modulation of central neural pathway underlying acupuncture action: A systematic review                                        | Review              | Current Medical Imaging Reviews                               | 1        |
| 2009 | Benham and Johnson        | Could acupuncture needle sensation be a predictor of analgesic response?                                                                      | Commentary          | Acupuncture in Medicine                                       | 3        |
| 2009 | Borud et al               | The Acupuncture on Hot Flushes Among Menopausal Women (ACUFLASH) study, a randomized controlled trial                                         | RCT                 | Menopause-the Journal of the North American Menopause Society | 2        |
| 2009 | Brinkhaus                 | Effectiveness of diet and exercise vs. acupuncture for weight loss in obese women: Results of a pilot study - Commentary                      | Commentary          | Focus on Alternative and Complementary Therapies              | 4        |
| 2009 | Cho et al                 | Acupuncture for obesity: A systematic review and meta-analysis                                                                                | Review              | International Journal of Obesity                              | 2        |
| 2009 | Cho and Whang             | Acupuncture for alcohol dependence: A systematic review                                                                                       | Review              | Alcoholism: Clinical and Experimental Research                | 2        |
| 2009 | Collazo Chao              | Effectiveness of acupuncture in relieving pain refractory to conventional pharmacological therapy (Article in Spanish)                        | Observational study | Revista de la Sociedad Espanola del Dolor                     | 2        |
| 2009 | Dieterle et al            | A prospective randomized placebo-controlled study of the effect of acupuncture in infertile patients with severe oligoasthenozoospermia       | RCT                 | Fertility and Sterility                                       | 2        |

|      |                       |                                                                                                                                                                                          |                                          |                                                   |          |
|------|-----------------------|------------------------------------------------------------------------------------------------------------------------------------------------------------------------------------------|------------------------------------------|---------------------------------------------------|----------|
| 2009 | Dijkers               | Ensuring Inclusion of Research Reports in Systematic Reviews                                                                                                                             | Review: research methodology discussions | Archives of Physical Medicine and Rehabilitation  | 2        |
| 2009 | Ferreira              | Diagnostic accuracy of pattern differentiation algorithm based on Chinese medicine theory: A stochastic simulation study                                                                 | Observational study                      | Chinese Medicine                                  | 4        |
| 2009 | Hielm-Bjorkman et al  | Psychometric testing of the Helsinki chronic pain index by completion of a questionnaire in Finnish by owners of dogs with chronic signs of pain caused by osteoarthritis                | Qualitative study                        | American Journal of Veterinary Research           | 2        |
| 2009 | Hughes                | "When I first started going I was going in on my knees, but I came out and I was skipping": Exploring rheumatoid arthritis patients' perceptions of receiving treatment with acupuncture | Qualitative study                        | Complementary Therapies in Medicine               | 3 (2002) |
| 2009 | Jordan and Lewis      | Improving the quality of reporting of research studies                                                                                                                                   | Editorial                                | Musculoskeletal Care                              | 2        |
| 2009 | Kottow                | Could bioethics recommend acupuncture for public health programmes?                                                                                                                      | Commentary                               | Acupuncture in Medicine                           | 3        |
| 2009 | Lee et al             | Acupuncture for treating hot flushes in men with prostate cancer: A systematic review                                                                                                    | Review                                   | Supportive Care in Cancer                         | 2        |
| 2009 | Liu et al             | An acupuncture meta-analysis for optic atrophy: Seven randomized, controlled trials                                                                                                      | Review                                   | Neural Regeneration Research                      | 2        |
| 2009 | Lu et al              | Acupuncture for chemotherapy-induced neutropenia in patients with gynecologic malignancies: A pilot randomized, sham-controlled clinical trial                                           | RCT                                      | Journal of Alternative and Complementary Medicine | 3        |
| 2009 | MacPherson and Altman | Improving the quality of reporting acupuncture interventions: describing the collaboration between STRICTA, CONSORT and the Chinese Cochrane Centre                                      | Guidelines related                       | Journal of Evidence-Based Medicine                | 3        |

|      |                        |                                                                                                                                          |                     |                                                   |   |
|------|------------------------|------------------------------------------------------------------------------------------------------------------------------------------|---------------------|---------------------------------------------------|---|
| 2009 | Ospina-Díaz            | Introduction to acupuncture. Basics and importance for the primary care physician (Article in Spanish)                                   | Review              | Semergen                                          | 1 |
| 2009 | Park et al             | Evaluation of manual acupuncture at classical and nondefined points for treatment of functional dyspepsia: A randomized-controlled trial | RCT                 | Journal of Alternative and Complementary Medicine | 3 |
| 2009 | Roberts et al          | A systematic review of the clinical effectiveness of acupuncture for allergic rhinitis (Article in Spanish)                              | Note                | Revista Internacional de Acupuntura               | 4 |
| 2009 | Scardina et al         | The effect of acupuncture on oral microcirculation in healthy volunteers: An exploratory study                                           | RCT                 | Acupuncture in Medicine                           | 3 |
| 2009 | Schroer and MacPherson | Acupuncture, or non-directive counselling versus usual care for the treatment of depression: A pilot study                               | Protocol            | Trials                                            | 1 |
| 2009 | Scott et al            | Trigger point injections for chronic non-malignant musculoskeletal pain: A systematic review                                             | Review              | Pain Medicine                                     | 2 |
| 2009 | Stock-Schroer et al    | Reporting experiments in homeopathic basic research (REHBaR) - A detailed guideline for authors                                          | Guidelines          | Homeopathy                                        | 4 |
| 2009 | Wesolowski et al       | Acupuncture reveals no specific effect on primary auditory cortex: A functional magnetic resonance imaging study                         | Observational study | NeuroReport                                       | 2 |
| 2009 | Yang et al             | Acupuncture in patients with carpal tunnel syndrome a randomized controlled trial                                                        | RCT                 | Clinical Journal of Pain                          | 2 |
| 2009 | Yeung et al            | Traditional needle acupuncture treatment for insomnia: A systematic review of randomized controlled trials                               | Review              | Sleep Medicine                                    | 1 |
| 2009 | Yeung et al            | Electroacupuncture for primary insomnia: A randomized controlled trial                                                                   | RCT                 | Sleep                                             | 2 |
| 2009 | Zhang et al            | Combination of acupuncture and fluoxetine for depression: A randomized, double-blind, sham-controlled trial                              | RCT                 | Journal of Alternative and Complementary Medicine | 3 |

|      |                |                                                                                                                                                                       |                                          |                                                              |          |
|------|----------------|-----------------------------------------------------------------------------------------------------------------------------------------------------------------------|------------------------------------------|--------------------------------------------------------------|----------|
| 2009 | Zheng et al    | Acupuncture as a treatment for functional dyspepsia: Design and methods of a randomized controlled trial                                                              | RCT                                      | Trials                                                       | 1        |
| 2010 | Anastasi et al | Acupuncture/moxibustion RCT for distal sensory peripheral neuropathy in HIV/AIDS: Rationale, design, methods, procedure and logistics                                 | Review: research methodology discussions | European Journal of Oriental Medicine                        | 4        |
| 2010 | Asher et al    | Auriculotherapy for pain management: A systematic review and meta-analysis of randomized controlled trials                                                            | Review                                   | Journal of Alternative and Complementary Medicine            | 3        |
| 2010 | Capili et al   | Adverse event reporting in acupuncture clinical trials focusing on pain                                                                                               | Review: research methodology discussions | Clinical Journal of Pain                                     | 2        |
| 2010 | Cho and Hwang  | Acupuncture for primary dysmenorrhoea: A systematic review                                                                                                            | Review                                   | BJOG: An International Journal of Obstetrics and Gynaecology | 2        |
| 2010 | Cho and Kim    | Efficacy of acupuncture in management of premenstrual syndrome: A systematic review                                                                                   | Review                                   | Complementary Therapies in Medicine                          | 3 (2002) |
| 2010 | Collazo Chao   | Effectiveness of acupuncture therapy for pain relief in patients with fibromyalgia (Article in Spanish)                                                               | Observational study                      | Revista Internacional de Acupuntura                          | 4        |
| 2010 | Collazo        | Acupuncture treatment in headache refractory to conventional therapies (Article in Spanish)                                                                           | Observational study                      | Revista de la Sociedad Espanola del Dolor                    | 2        |
| 2010 | Cotchett et al | Effectiveness of dry needling and injections of myofascial trigger points associated with plantar heel pain: A systematic review                                      | Review                                   | Journal of Foot and Ankle Research                           | 2        |
| 2010 | Crew et al     | Randomized, blinded, sham-controlled trial of acupuncture for the management of aromatase inhibitor-associated joint symptoms in women with early-stage breast cancer | RCT                                      | Journal of Clinical Oncology                                 | 2        |
| 2010 | Gibson et al   | Acupuncture for respiratory disorder: what's the point?                                                                                                               | Review                                   | Expert Review of Respiratory Medicine                        | 1        |
| 2010 | Gross et al    | Manipulation or mobilisation for neck pain                                                                                                                            | Review                                   | Cochrane Database of Systematic Reviews                      | 1        |

|      |                   |                                                                                                                                              |                     |                                                   |   |
|------|-------------------|----------------------------------------------------------------------------------------------------------------------------------------------|---------------------|---------------------------------------------------|---|
| 2010 | Kim et al         | Effects of acupuncture on hot flashes in perimenopausal and postmenopausal women-a multicenter randomized clinical trial                     | RCT                 | Menopause                                         | 2 |
| 2010 | Kim and Zhu       | Acupuncture for essential hypertension                                                                                                       | Review              | Alternative Therapies in Health and Medicine      | 4 |
| 2010 | Kuo et al         | Blood flow effect of acupuncture on the human meridian                                                                                       | Observational study | Medical Acupuncture                               | 4 |
| 2010 | Langhorst et al   | Efficacy of acupuncture in fibromyalgia syndrome-a systematic review with a meta-analysis of controlled clinical trials                      | Review              | Rheumatology                                      | 2 |
| 2010 | Lewith            | Acupuncture placebos                                                                                                                         | Review              | European Journal of Oriental Medicine             | 4 |
| 2010 | List and Axelsson | Management of TMD: Evidence from systematic reviews and meta-analyses                                                                        | Review              | Journal of Oral Rehabilitation                    | 2 |
| 2010 | MacPherson        | Towards better reporting of interventions in clinical trials of acupuncture                                                                  | Editorial           | Journal of Chinese Integrative Medicine           | 3 |
| 2010 | MacPherson et al  | Revised standards for reporting interventions in clinical trials of acupuncture (STRICTA): Extending the consort statement (Chinese version) | Guidelines          | Journal of Chinese Integrative Medicine           | 3 |
| 2010 | MacPherson et al  | Revised standards for reporting interventions in clinical trials of acupuncture (STRICTA): Extending the consort statement                   | Guidelines          | Acupuncture in Medicine                           | 3 |
| 2010 | MacPherson et al  | Revised standards for reporting interventions in clinical trials of acupuncture (STRICTA): Extending the consort statement                   | Guidelines          | Journal of Alternative and Complementary Medicine | 3 |
| 2010 | MacPherson et al  | Revised standards for reporting interventions in clinical trials of acupuncture (STRICTA): Extending the consort statement                   | Guidelines          | PLoS Medicine                                     | 3 |
| 2010 | MacPherson et al  | Revised standards for reporting interventions in clinical trials of acupuncture (STRICTA): Extending the consort statement (Chinese version) | Guidelines          | Chinese Journal of Evidence-Based Medicine        | 1 |

|      |                      |                                                                                                                                            |                                          |                                                   |   |
|------|----------------------|--------------------------------------------------------------------------------------------------------------------------------------------|------------------------------------------|---------------------------------------------------|---|
| 2010 | MacPherson et al     | Revised standards for reporting interventions in clinical trials of acupuncture (STRICTA): Extending the consort statement                 | Guidelines                               | Medical Acupuncture                               | 3 |
| 2010 | MacPherson et al     | Revised standards for reporting interventions in clinical trials of acupuncture (STRICTA): Extending the consort statement                 | Guidelines                               | Journal of Evidence-Based Medicine                | 3 |
| 2010 | MacPherson and Jobst | Improving the reporting of interventions in clinical trials of acupuncture: The updated and revised STRICTA                                | Editorial                                | Journal of Alternative and Complementary Medicine | 3 |
| 2010 | Miao                 | Clinical critical qualitative evaluation of the selected randomized controlled trials in current acupuncture researches for low back pain  | Review: research methodology discussions | Journal of Chinese Integrative Medicine           | 3 |
| 2010 | Miao and Miao        | Effect of electroacupuncture on the third lumbar transverse process syndrome: A randomized controlled trial                                | RCT                                      | Medical Acupuncture                               | 3 |
| 2010 | Miller et al         | Manual therapy and exercise for neck pain: A systematic review                                                                             | Review                                   | Manual Therapy                                    | 2 |
| 2010 | Ronan et al          | Acupuncture and schizophrenia - Effect and acceptability: Preliminary results of the first UK study                                        | Review                                   | European Journal of Oriental Medicine             | 4 |
| 2010 | Smith et al          | Acupuncture for depression                                                                                                                 | Review                                   | Cochrane Database of Systematic Reviews           | 1 |
| 2010 | Son et al            | Efficacy of ah shi point acupuncture on acne vulgaris                                                                                      | RCT                                      | Acupuncture in Medicine                           | 3 |
| 2010 | Vickers et al        | Individual patient data meta-analysis of acupuncture for chronic pain: Protocol of the Acupuncture Trialists' Collaboration                | Protocol                                 | Trials                                            | 1 |
| 2010 | White et al          | Does needling sensation (de qi) affect treatment outcome in pain? Analysis of data from a larger single-blind, randomised controlled trial | RCT                                      | Acupuncture in Medicine                           | 3 |
| 2010 | Wu et al             | Acupuncture in poststroke rehabilitation: A systematic review and meta-analysis of randomized trials                                       | Review                                   | Stoke                                             | 1 |



|      |                    |                                                                                                                                                  |                                          |                                                       |   |
|------|--------------------|--------------------------------------------------------------------------------------------------------------------------------------------------|------------------------------------------|-------------------------------------------------------|---|
| 2010 | Yeo et al          | Consecutive acupuncture stimulations lead to significantly decreased neural responses                                                            | Observational study                      | Journal of Alternative and Complementary Medicine     | 3 |
| 2010 | Zaringhalam et al  | Reduction of chronic non-specific low back pain: A randomised controlled clinical trial on acupuncture and baclofen                              | RCT                                      | Chinese Medicine                                      | 4 |
| 2010 | Zaslowski          | Ethical considerations for acupuncture and chinese herbal medicine clinical trials: A cross-cultural perspective                                 | Commentary                               | Evidence-based Complementary and Alternative Medicine | 4 |
| 2010 | Zheng et al        | Quality of randomized controlled trials in acupuncture treatment of hepatitis B virus infection - A systematic review                            | Review: research methodology discussions | Acupuncture and Electro-Therapeutics Research         | 4 |
| 2011 | Asher et al        | Quality of reporting on randomised controlled trials of auriculotherapy for pain                                                                 | Review: research methodology discussions | Acupuncture in Medicine                               | 3 |
| 2011 | Bian et al         | Consolidated standards of reporting trials (CONSORT) for traditional Chinese medicine: Current situation and future development                  | Review: research methodology discussions | Frontiers of Medicine in China                        | 1 |
| 2011 | Cohen et al        | Acupuncture as analgesia for low back pain, ankle sprain and migraine in emergency departments: Study protocol for a randomized controlled trial | Protocol                                 | Trials                                                | 1 |
| 2011 | Cotchett et al     | Effectiveness of trigger point dry needling for plantar heel pain: Study protocol for a randomised controlled trial                              | Protocol                                 | Journal of Foot and Ankle Research                    | 2 |
| 2011 | Cotchett et al     | Consensus for dry needling for plantar heel pain (plantar fasciitis): A modified Delphi study                                                    | Delphi study                             | Acupuncture in Medicine                               | 3 |
| 2011 | Hammerschlag et al | Randomized controlled trials of acupuncture (1997-2007): An assessment of reporting quality with a CONSORT- and STRICTA-based instrument         | Review: research methodology discussions | Evidence-based Complementary and Alternative Medicine | 4 |
| 2011 | Kim et al          | Acupuncture for symptom management in hemodialysis patients: A prospective, observational pilot study                                            | Observational study                      | Journal of Alternative and Complementary Medicine     | 3 |
| 2011 | Kim et al          | The effectiveness of moxibustion: An overview during 10 Years                                                                                    | Review                                   | Evidence-Based Complementary and Alternative Medicine | 4 |

|      |                     |                                                                                                                                                          |                                          |                                                       |   |
|------|---------------------|----------------------------------------------------------------------------------------------------------------------------------------------------------|------------------------------------------|-------------------------------------------------------|---|
| 2011 | Long et al          | Exploring the evidence base for acupuncture in the treatment of Meniere's Syndrome-A systematic review                                                   | Review                                   | Evidence-Based Complementary and Alternative Medicine | 4 |
| 2011 | Lu et al            | Does acupuncture improve quality of life for patients with pain associated with the spine? A systematic review                                           | Review                                   | Evidence-Based Complementary and Alternative Medicine | 4 |
| 2011 | Man et al           | Transcutaneous electrical nerve stimulation on ST36 and SP6 acupoints prevents hyperglycaemic response during anaesthesia: A randomised controlled trial | RCT                                      | European Journal of Anaesthesiology                   | 2 |
| 2011 | Moher et al         | Describing reporting guidelines for health research: A systematic review                                                                                 | Review: research methodology discussions | Journal of Clinical Epidemiology                      | 2 |
| 2011 | Molsberger et al    | An international expert survey on acupuncture in randomized controlled trials for low back pain and a validation of the low back pain acupuncture score  | Survey                                   | European Journal of Medical Research                  | 1 |
| 2011 | Myung et al         | Ameliorative effect of purple bamboo salt-pharmaceutical acupuncture on cisplatin-induced ototoxicity                                                    | Animal studies                           | Acta Oto-Laryngologica                                | 2 |
| 2011 | Paterson et al      | Acupuncture for 'frequent attenders' with medically unexplained symptoms: A randomised controlled trial (CACTUS study)                                   | RCT                                      | British Journal of General Practice                   | 1 |
| 2011 | Price et al         | Getting inside acupuncture trials - Exploring intervention theory and rationale                                                                          | Review: research methodology discussions | BMC Complementary and Alternative Medicine            | 4 |
| 2011 | Ronan et al         | A case study exploration of the value of acupuncture as an adjunct treatment for patients diagnosed with schizophrenia: Results and future study design  | Case series                              | Journal of Chinese Integrative Medicine               | 3 |
| 2011 | Schmulson and Chang | Review article: The treatment of functional abdominal bloating and distension                                                                            | Review                                   | Alimentary Pharmacology and Therapeutics              | 1 |

|      |                     |                                                                                                                                                        |                                          |                                                       |   |
|------|---------------------|--------------------------------------------------------------------------------------------------------------------------------------------------------|------------------------------------------|-------------------------------------------------------|---|
| 2011 | Schytt et al        | Incompleteness of Swedish local clinical guidelines for acupuncture treatment during childbirth                                                        | Survey                                   | Acta Obstetrica Et Gynecologica Scandinavica          | 2 |
| 2011 | Smith et al         | Development of an instrument to assess the quality of acupuncture: Results from a Delphi process                                                       | Guidelines related                       | Journal of Alternative and Complementary Medicine     | 3 |
| 2011 | Stock-Schroer et al | Reporting experiments in homeopathic basic research-Description of the checklist development                                                           | Guidelines related                       | Evidence-Based Complementary and Alternative Medicine | 4 |
| 2011 | Stub et al          | Acupuncture treatment for depression-A systematic review and meta-analysis                                                                             | Review                                   | European Journal of Integrative Medicine              | 4 |
| 2011 | Wang and Young      | Needling the pain and comforting the brain: Acupuncture in the treatment of chronic migraine                                                           | Editorial                                | Cephalalgia                                           | 2 |
| 2011 | Wetzel et al        | The effect of auricular acupuncture on fentanyl requirement during hip arthroplasty: A randomized controlled trial                                     | RCT                                      | Clinical Journal of Pain                              | 2 |
| 2011 | Wright and Aickin   | Improvement of menopausal symptoms with acupuncture not reflected in changes to heart rate variability                                                 | Observational study                      | Acupuncture in Medicine                               | 3 |
| 2011 | Xiao et al          | Assessing the quality of reports about randomized controlled trials of acupuncture treatment on mild cognitive impairment                              | Review: research methodology discussions | PLoS ONE                                              | 1 |
| 2011 | Xu and Chen         | Acupuncture: A paradigm of worldwide cross-cultural communication                                                                                      | Editorial                                | Chinese Journal of Integrative Medicine               | 4 |
| 2011 | Yang et al          | Acupuncture versus topiramate in chronic migraine prophylaxis: A randomized clinical trial                                                             | RCT                                      | Cephalalgia                                           | 2 |
| 2011 | Yeung et al         | Electroacupuncture for residual insomnia associated with major depressive disorder: A randomized controlled trial                                      | RCT                                      | Sleep                                                 | 2 |
| 2011 | Yu et al            | Effects of electroacupuncture on Benign Prostate Hyperplasia patients with lower urinary tract symptoms: A single-blinded, randomized controlled trial | RCT                                      | Evidence-Based Complementary and Alternative Medicine | 4 |

|      |                    |                                                                                                                                                         |                                          |                                                        |   |
|------|--------------------|---------------------------------------------------------------------------------------------------------------------------------------------------------|------------------------------------------|--------------------------------------------------------|---|
| 2011 | Zhou et al         | Acupuncture and auricular acupressure in relieving menopausal hot flashes of bilaterally ovariectomized Chinese women: A randomized controlled trial    | RCT                                      | Evidence-based Complementary and Alternative Medicine  | 4 |
| 2012 | Chen et al         | Designing and implementing multicenter clinical randomized controlled trials on moxibustion with large samples                                          | Review: research methodology discussions | Journal of Traditional Chinese Medicine                | 4 |
| 2012 | Chung et al        | Randomized non-invasive sham-controlled pilot trial of electroacupuncture for postpartum depression                                                     | RCT                                      | Journal of Affective Disorders                         | 2 |
| 2012 | Collazo Cha        | Acupuncture and traditional Chinese dietary therapy in the treatment of patients with fibromyalgia. A randomized prospective study (Article in Spanish) | RCT                                      | Revista Internacional de Acupuntura                    | 4 |
| 2012 | Duncan et al       | Evaluating intense rehabilitative therapies with and without acupuncture for children with cerebral palsy: A randomized controlled trial                | RCT                                      | Archives of Physical Medicine and Rehabilitation       | 2 |
| 2012 | Ferro et al        | The combined effect of acupuncture and Tanacetum parthenium on quality of life in women with headache: Randomised study                                 | RCT                                      | Acupuncture in Medicine                                | 3 |
| 2012 | Iseri and Cabioglu | Migraine treatment and the role of acupuncture: A literature review                                                                                     | Review                                   | Journal of the Australian Traditional-Medicine Society | 4 |
| 2012 | Lu et al           | Acupuncture for dysphagia after chemoradiation in head and neck cancer: Rationale and design of a randomized, sham-controlled trial                     | Protocol                                 | Contemporary Clinical Trials                           | 1 |
| 2012 | Manheimer et al    | Acupuncture for treatment of irritable bowel syndrome                                                                                                   | Review                                   | Cochrane Database of Systematic Reviews                | 1 |
| 2012 | Mathie et al       | Method for appraising model validity of randomised controlled trials of homeopathic treatment: Multi-rater concordance study                            | Review: research methodology discussions | BMC Medical Research Methodology                       | 1 |
| 2012 | Patel et al        | Massage for mechanical neck disorders                                                                                                                   | Review                                   | Cochrane Database of Systematic Reviews                | 1 |

|      |                    |                                                                                                                                                        |                                          |                                                       |    |
|------|--------------------|--------------------------------------------------------------------------------------------------------------------------------------------------------|------------------------------------------|-------------------------------------------------------|----|
| 2012 | Purepong et al     | External validity in randomised controlled trials of acupuncture for osteoarthritis knee pain                                                          | Review: research methodology discussions | Acupuncture in Medicine                               | 3  |
| 2012 | Shuai et al        | Issues of design and statistical analysis in controlled clinical acupuncture trials: An analysis of English-language reports from Western journals     | Review: research methodology discussions | Statistics in Medicine                                | 2  |
| 2012 | Smith and Bauer    | Traditional Chinese Medicine for cancer-related symptoms                                                                                               | Review                                   | Seminars in Oncology Nursing                          | 2  |
| 2012 | Steinlechner       | Be routinely recommended for the treatment of breech presentation?                                                                                     | Review                                   | Journal of Chinese Medicine                           | 4  |
| 2012 | Tam et al          | Citation classics in the integrative and complementary medicine literature: 50 frequently cited articles                                               | Review                                   | European Journal of Integrative Medicine              | 4  |
| 2012 | van den Berg et al | Effect of acupuncture on pain and inflammation in patients with complex regional pain syndrome type 1. A small exploratory randomized controlled trial | RCT                                      | Conference: 15th World Congress of Pain Clinicians    | NA |
| 2012 | Xue et al          | Effect of electroacupuncture on opioid consumption in patients with chronic musculoskeletal pain: protocol of a randomised controlled trial            | Protocol                                 | Trials                                                | 1  |
| 2012 | Yang et al         | Reports quality evaluation on acupuncture for treating acute attacks of migraine                                                                       | Review: research methodology discussions | Chinese Journal of Evidence-Based Medicine            | 1  |
| 2012 | Yao et al          | Randomized controlled trial comparing acupuncture with placebo acupuncture for the treatment of Carpal Tunnel Syndrome                                 | RCT                                      | PM and R                                              | 1  |
| 2013 | Bai and Lao        | Neurobiological foundations of acupuncture: The relevance and future prospect based on neuroimaging evidence                                           | Review                                   | Evidence-based Complementary and Alternative Medicine | 4  |
| 2013 | Chen et al         | Integrating acupuncture with exercise-based physical therapy for knee osteoarthritis: A randomized controlled trial                                    | RCT                                      | Journal of Clinical Rheumatology                      | 2  |

|      |                              |                                                                                                                                                                       |                                          |                                                        |          |
|------|------------------------------|-----------------------------------------------------------------------------------------------------------------------------------------------------------------------|------------------------------------------|--------------------------------------------------------|----------|
| 2013 | Collazo Chao and Muñoz Reina | Scalp acupuncture and acupuncture for treatment of patients with fibromyalgia. Prospective randomized study (Article in Spanish)                                      | RCT                                      | Revista Internacional de Acupuntura                    | 4        |
| 2013 | Da Silva et al               | Integrative medicine, integrative acupuncture                                                                                                                         | Editorial                                | European Journal of Integrative Medicine               | 4        |
| 2013 | Deare et al                  | Acupuncture for treating fibromyalgia                                                                                                                                 | Review                                   | Cochrane Database of Systematic Reviews                | 1        |
| 2013 | He et al                     | Acupuncture and moxibustion for cancer-related fatigue: A systematic review and meta-analysis                                                                         | Review                                   | Asian Pacific Journal of Cancer Prevention             | 2        |
| 2013 | Kamioka et al                | A checklist to assess the quality of reports on spa therapy and balneotherapy trials was developed using the Delphi consensus method: The SPAC checklist              | Guidelines related                       | Complementary Therapies in Medicine                    | 3 (2002) |
| 2013 | Li et al                     | Clinical effect of catgut implantation at acupoints for allergic rhinitis: study protocol for a randomized controlled trial                                           | Protocol                                 | Trials                                                 | 1        |
| 2013 | Lima et al                   | Acupuncture effectiveness as a complementary therapy in functional dyspepsia patients                                                                                 | RCT                                      | Arquivos de Gastroenterologia                          | 2        |
| 2013 | Liu et al                    | Does traditional chinese medicine pattern affect acupoint specific effect? Analysis of data from a multicenter, randomized, controlled trial for primary dysmenorrhea | RCT                                      | Journal of Alternative and Complementary Medicine      | 3        |
| 2013 | Mannix et al                 | Acupuncture for managing phantom-limb syndrome: A systematic review                                                                                                   | Review                                   | Medical Acupuncture                                    | 3        |
| 2013 | Manterola et al              | Initiatives for reporting biomedical research results with different types of designs                                                                                 | Review: research methodology discussions | International Journal of Morphology                    | 2        |
| 2013 | McKeon et al                 | Acupuncture and acupressure for chemotherapy-induced nausea and vomiting: A systematic review                                                                         | Review                                   | Australian Journal of Acupuncture and Chinese Medicine | 3        |
| 2013 | Montgomery et al             | The Oxford Implementation Index: A new tool for incorporating implementation data into systematic reviews and meta-analyses                                           | Guidelines related                       | Journal of Clinical Epidemiology                       | 2        |

|      |                  |                                                                                                                                                                              |                                          |                                                       |   |
|------|------------------|------------------------------------------------------------------------------------------------------------------------------------------------------------------------------|------------------------------------------|-------------------------------------------------------|---|
| 2013 | Paulson and Shay | Sympathetic nervous system responses to acupuncture and non-penetrating sham acupuncture in experimental forearm pain: A single-blind randomised descriptive study           | RCT                                      | Acupuncture in Medicine                               | 3 |
| 2013 | Shin et al       | Effects of motion style acupuncture treatment in acute low back pain patients with severe disability: A multicenter, randomized, controlled, comparative effectiveness trial | RCT                                      | Pain                                                  | 2 |
| 2013 | Sun et al        | Electroacupuncture at Jing-jiaji points for neck pain caused by cervical spondylosis: A study protocol for a randomized controlled pilot trial                               | Protocol                                 | Trials                                                | 1 |
| 2013 | Yin et al        | Therapeutic applications of herbal medicines for cancer patients                                                                                                             | Review                                   | Evidence-based Complementary and Alternative Medicine | 4 |
| 2013 | Zhang et al      | Acupuncture as prophylaxis for menstrual-related migraine: Study protocol for a multicenter randomized controlled trial                                                      | Protocol                                 | Trials                                                | 1 |
| 2013 | Zhang et al      | The preventive and therapeutic effect of acupuncture for radiation-induced xerostomia in patients with head and neck cancer: A systematic review                             | Review                                   | Integrative Cancer Therapies                          | 2 |
| 2014 | Bryant et al     | A systematic review of the quality of reporting in published smoking cessation trials for pregnant women: An explanation for the evidence-practice gap?                      | Review: research methodology discussions | Implementation Science                                | 1 |
| 2014 | Cayir et al      | Acupuncture decreases matrix metalloproteinase-2 activity in patients with migraine                                                                                          | Observational study                      | Acupuncture in Medicine                               | 3 |
| 2014 | Chu et al        | Reporting quality of English randomized controlled trials on acupuncture for neck disorders by the CONSORT statement and STRICTA                                             | Review: research methodology discussions | Chinese Journal of Evidence-Based Medicine            | 1 |

|      |                   |                                                                                                                                                                                                                                                |                                          |                                                       |          |
|------|-------------------|------------------------------------------------------------------------------------------------------------------------------------------------------------------------------------------------------------------------------------------------|------------------------------------------|-------------------------------------------------------|----------|
| 2014 | Collazo et al     | Randomized prospective study to assess the effectiveness of several therapeutic procedures of traditional Chinese medicine in alleviation of pain and improvement in the standard of living in patients with fibromyalgia (Article in Spanish) | RCT                                      | Revista Internacional de Acupuntura                   | 4        |
| 2014 | Gu et al          | Assessment of registration information on methodological design of acupuncture RCTs: A review of 453 registration records retrieved from WHO International Clinical Trials Registry Platform                                                   | Review: research methodology discussions | Evidence-Based Complementary and Alternative Medicine | 4        |
| 2014 | Haddad and Palesh | Acupuncture in the treatment of cancer-related psychological symptoms                                                                                                                                                                          | Review                                   | Integrative Cancer Therapies                          | 2        |
| 2014 | Kamioka et al     | Assessing the quality of study reports on spa therapy based on randomized controlled trials by the spa therapy checklist (SPAC)                                                                                                                | Review: research methodology discussions | Complementary Therapies in Clinical Practice          | 4        |
| 2014 | Kamioka et al     | Effectiveness of animal-assisted therapy: A systematic review of randomized controlled trials                                                                                                                                                  | Review                                   | Complementary Therapies in Medicine                   | 3 (2002) |
| 2014 | Kamioka et al     | Effectiveness of horticultural therapy: A systematic review of randomized controlled trials                                                                                                                                                    | Review                                   | Complementary Therapies in Medicine                   | 3 (2002) |
| 2014 | Lee et al         | Effects of Wonli acupuncture procedure in patients with LSS: A clinical, retrospective study                                                                                                                                                   | Observational study                      | Evidence-Based Complementary and Alternative Medicine | 4        |
| 2014 | Luo et al         | Quality of reporting of randomised controlled trials of acupuncture for neurological diseases conducted in China                                                                                                                               | Review: research methodology discussions | Acupuncture in Medicine                               | 3        |
| 2014 | Ortiz et al       | A randomised multicentre trial of acupuncture in patients with seasonal allergic rhinitis - Trial intervention including physician and treatment characteristics                                                                               | RCT related                              | BMC Complementary and Alternative Medicine            | 4        |
| 2014 | Park et al        | Acupuncture for the treatment of spasticity after stroke: A meta-analysis of randomized controlled trials                                                                                                                                      | Review                                   | Journal of Alternative and Complementary Medicine     | 3        |
| 2014 | Stevens et al     | Relation of completeness of reporting of health research to journals' endorsement of reporting guidelines: Systematic review                                                                                                                   | Review: research methodology discussions | BMJ                                                   | 1        |



|                                                                        |                  |                                                                                                                                                  |                                          |                                                                             |    |
|------------------------------------------------------------------------|------------------|--------------------------------------------------------------------------------------------------------------------------------------------------|------------------------------------------|-----------------------------------------------------------------------------|----|
| 2014                                                                   | Zhang et al      | Electroacupuncture for pressure ulcer: A study protocol for a randomized controlled pilot trial                                                  | Protocol                                 | Trials                                                                      | 1  |
| <i>From Chinese database (China National Knowledge Infrastructure)</i> |                  |                                                                                                                                                  |                                          |                                                                             |    |
| 2003                                                                   | Liu et al        | Improving the quality of the report of acupuncture controlled trial by using CONSORT and STRICTA                                                 | Recommendations                          | Chinese Acupuncture and Moxibustion                                         | 4  |
| 2006                                                                   | Zhang et al      | Assessing the reporting quality of randomized controlled trials on acupuncture for Acute Ischemic Stroke using the CONSORT statement and STRICTA | Review: research methodology discussions | Chinese Journal of Evidence-Based Medicine                                  | 1  |
| 2007                                                                   | Fei and Liu      | Reporting interventions in clinical trials of acupuncture- The introduction and evaluation of the STRICTA standards                              | Recommendations                          | Journal of Traditional Chinese Medicine                                     | 4  |
| 2008                                                                   | Zhu et al        | Use of CONSORT and STRICTA to assess the quality of randomized controlled trials of acupuncture treatment of Functional Dyspepsia                | Review: research methodology discussions | Shanghai Journal of Acupuncture and Moxibustion                             | 4  |
| 2008                                                                   | Lu et al         | Assessing the reporting quality of randomized controlled trials on acupuncture for migraine using the CONSORT and STRICTA statement              | Review: research methodology discussions | Journal of Chengdu University of Traditional Chinese Medicine               | 4  |
| 2008                                                                   | Ai et al         | Assessing the reporting quality of randomized controlled trials on acupuncture in children with Cerebral Palsy in China                          | Review: research methodology discussions | West China Medical Journal                                                  | 1  |
| 2009                                                                   | Liu              | Clinical effect evaluation of a RCT for cotton-sheet moxibustion therapy in patients with Herpes Zoster                                          | RCT                                      | Doctoral dissertation in Chengdu University of Traditional Chinese Medicine | NA |
| 2010                                                                   | MacPherson et al | Revised standards for reporting interventions in clinical trials of acupuncture (STRICTA): Extending the consort statement (Chinese version)     | Guidelines                               | Chinese Journal of Evidence-Based Medicine                                  | 1  |
| 2010                                                                   | MacPherson et al | Revised Standards for Reporting Interventions in Clinical Trials of Acupuncture (STRICTA): Extending the CONSORT statement (Chinese version)     | Guidelines                               | Journal of Chinese Integrative Medicine                                     | 3  |
| 2010                                                                   | Sun et al        | Assessment of the reporting quality of randomized controlled trials on acupuncture for simple obesity with the CONSORT statement and STRICTA     | Review: research methodology discussions | Lishizhen Medicine and Materia Medica Research                              | 4  |

|                                                                                                 |                        |                                                                                                                                                        |                                          |                                                                 |    |
|-------------------------------------------------------------------------------------------------|------------------------|--------------------------------------------------------------------------------------------------------------------------------------------------------|------------------------------------------|-----------------------------------------------------------------|----|
| 2013                                                                                            | Zhao                   | Assessment of the reporting quality of randomized controlled trials on acupuncture for Perimenopausal Syndrome with the CONSORT statement and STRICTA  | Review: research methodology discussions | Journal of Liaoning University of Traditional Chinese Medicine  | 4  |
| 2013                                                                                            | Chen                   | Assessment of the reporting quality of randomized controlled trials on acupuncture for Irritable Bowel Syndrome with the CONSORT statement and STRICTA | Review: research methodology discussions | Journal of Liaoning University of Traditional Chinese Medicine  | 4  |
| 2013                                                                                            | Zhong and Li           | Evaluating the quality of clinical randomized controlled trials reports on acupuncture treating Chronic Atrophic Gastritis with CONSORT and STRICTA    | Review: research methodology discussions | Lishizhen Medicine and Materia Medica Research                  | 4  |
| 2013                                                                                            | Xu et al               | Quality of reporting on randomised controlled trials of acupuncture for cervical vertigo                                                               | Review: research methodology discussions | Journal of Shaanxi College of Traditional Chinese Medicine      | 4  |
| 2013                                                                                            | Wang                   | Regulating-acupuncture for Allergic Rhinitis: A randomized controlled trial                                                                            | RCT                                      | Doctoral dissertation in Beijing University of Chinese Medicine | NA |
| 2013                                                                                            | Sun                    | Quality of reporting on randomized controlled trials of acupuncture for Post-stroke Spastic Hemiplegic                                                 | Review: research methodology discussions | Master thesis in Beijing University of Chinese Medicine         | NA |
| 2014                                                                                            | Zhu et al              | Reporting quality of English randomized controlled trials on acupuncture for Neck Disorders by the CONSORT statement and STRICTA                       | Review: research methodology discussions | Chinese Journal of Evidence-Based Medicine                      | 1  |
| 2014                                                                                            | Wang et al             | On quality of randomized controlled trial of Chronic Pelvic Inflammation treated with acupuncture and moxibustion                                      | Review: research methodology discussions | Shandong Journal of Traditional Chinese Medicine                | 4  |
| <i>From Japanese database (Japan Science and Technology Information Aggregator, Electronic)</i> |                        |                                                                                                                                                        |                                          |                                                                 |    |
| 2002                                                                                            | Tsukayama and Yamashta | Consensus recommendations for designing and reporting in clinical trials on acupuncture: An introduction of recommendations by STRICTA Group and IARF  | Recommendations                          | Journal of the Japan Society of Acupuncture and Moxibustion     | 4  |
| 2005                                                                                            | Lee et al              | Review of pragmatic clinical trials on acupuncture                                                                                                     | Review                                   | Journal of the Japan Society of Acupuncture and Moxibustion     | 4  |

|                                                                                                                                                                                                                                                                       |                  |                                                                                                                                                                                                          |                                          |                                                                                      |   |
|-----------------------------------------------------------------------------------------------------------------------------------------------------------------------------------------------------------------------------------------------------------------------|------------------|----------------------------------------------------------------------------------------------------------------------------------------------------------------------------------------------------------|------------------------------------------|--------------------------------------------------------------------------------------|---|
| 2008                                                                                                                                                                                                                                                                  | Kamioka et al    | Significance of utilizing checklists and statements for improvement of the quality of studies concerning hot springs: Evidence grading and various study designs of epidemiological and clinical studies | Review: research methodology discussions | The Journal of the Japanese Society of Balneology, Climatology and Physical Medicine | 4 |
| 2010                                                                                                                                                                                                                                                                  | Nabeta et al     | Practice and educational effects of a simulated randomized controlled trial for acupuncture school teachers                                                                                              | Observational study                      | Journal of the Japan Society of Acupuncture and Moxibustion                          | 4 |
| 2013                                                                                                                                                                                                                                                                  | MacPherson et al | Revised STAndards for Reporting Interventions in Clinical Trials of Acupuncture (STRICTA): Extending the CONSORT statement (Japanese version)                                                            | Guidelines                               | Journal of the Japan Society of Acupuncture and Moxibustion                          | 4 |
| 2014                                                                                                                                                                                                                                                                  | Kamioka          | A checklist to assess the quality of reports on spa therapy and balneotherapy trials: The SPAC checklist                                                                                                 | Delphi study                             | The Journal of the Japanese Society of Balneology, Climatology and Physical Medicine | 4 |
| 2014                                                                                                                                                                                                                                                                  | Shimoichi et al  | Acupuncture for patients with lower back pain- Systematic review of randomized controlled trials conducted in Japan                                                                                      | Reviews                                  | Journal of the Japan Society of Acupuncture and Moxibustion                          | 4 |
| <p>Journal types:</p> <ol style="list-style-type: none"> <li>1. General medical non-CAM journals;</li> <li>2. Specialty medical non-CAM journals;</li> <li>3. CAM journals with STRICTA endorsement;</li> <li>4. CAM journals without STRICTA endorsement.</li> </ol> |                  |                                                                                                                                                                                                          |                                          |                                                                                      |   |
