# Supplementary material for: STRICTA: is it time to do more?
Source: PubMed Central journal article supplement (PMC4474462; doi:10.1186/s12906-015-0714-4), 2015-06-20
Supplement: 12906_2015_714_MOESM2_ESM.pdf [file 12906_2015_714_MOESM2_ESM.pdf]

**Table S2. Characteristics of articles cited STRICTA 2010**

| Publication year                                          | Author(s)                | Article title                                                                                                                                                  | Study type                               | Journal name                                      | Journal type |
|-----------------------------------------------------------|--------------------------|----------------------------------------------------------------------------------------------------------------------------------------------------------------|------------------------------------------|---------------------------------------------------|--------------|
| <i>From English databases (Web of Science and Scopus)</i> |                          |                                                                                                                                                                |                                          |                                                   |              |
| 2010                                                      | Hopewell                 | Standards to improve the reporting of clinical trials in acupuncture                                                                                           | Commentary                               | Acupuncture in Medicine                           | 3            |
| 2010                                                      | Kim et al                | Psoas abscess caused by acupuncture?                                                                                                                           | Letter                                   | Hemodialysis International                        | 2            |
| 2010                                                      | MacPherson               | Towards better reporting of interventions in clinical trials of acupuncture                                                                                    | Editorial                                | Journal of Chinese Integrative Medicine           | 3            |
| 2010                                                      | Moher                    | Reports of randomized trials: Ensure they are transparent, accurate, and complete                                                                              | Editorial                                | Journal of Chinese Integrative Medicine           | 3            |
| 2010                                                      | O'Sullivan and Higginson | Clinical effectiveness and safety of acupuncture in the treatment of irradiation-induced xerostomia in patients with head and neck cancer: A systematic review | Review                                   | Acupuncture in Medicine                           | 3            |
| 2011                                                      | Asher et al              | Quality of reporting on randomised controlled trials of auriculotherapy for pain                                                                               | Review: research methodology discussions | Acupuncture in Medicine                           | 3            |
| 2011                                                      | Bian et al               | Consolidated standards of reporting trials (CONSORT) for traditional Chinese medicine: Current situation and future development                                | Review: research methodology discussions | Frontiers of Medicine in China                    | 1            |
| 2011                                                      | Bian and Chang           | Revised STRICTA as an extension of the CONSORT statement: More items should be involved in the checklist                                                       | Letter                                   | Journal of Alternative and Complementary Medicine | 3            |
| 2011                                                      | Burgos et al             | Construction of a scale to assess methodological quality of diagnostic tests articles (Article in Spanish)                                                     | Guidelines related                       | Revista Chilena De Cirugia                        | 2            |
| 2011                                                      | Corbett and Prestwich    | A questionnaire survey to determine patient's knowledge, opinions and experience of acupuncture in an NHS GP practice                                          | Letter                                   | Acupuncture in Medicine                           | 3            |

|      |                             |                                                                                                                                                                                           |                                          |                                                               |   |
|------|-----------------------------|-------------------------------------------------------------------------------------------------------------------------------------------------------------------------------------------|------------------------------------------|---------------------------------------------------------------|---|
| 2011 | Dhillon                     | Researching complementary and alternative therapies: Frameworks for evaluation                                                                                                            | Review: research methodology discussions | Cancer Forum                                                  | 2 |
| 2011 | Enblom et al                | The nonpenetrating telescopic sham needle may blind patients with different characteristics and experiences when treated by several therapists                                            | RCT                                      | Evidence-based Complementary and Alternative Medicine         | 4 |
| 2011 | Enblom et al                | Pilot testing of methods for evaluation of acupuncture for emesis during radiotherapy: A randomised single subject experimental design                                                    | RCT                                      | Acupuncture in Medicine                                       | 3 |
| 2011 | Eysenbach and Consort-Ehlth | CONSORT-EHEALTH: Improving and standardizing evaluation reports of web-based and mobile health interventions                                                                              | Guidelines related                       | Journal of Medical Internet Research                          | 1 |
| 2011 | Hammerschlag et al          | Randomized controlled trials of acupuncture (1997-2007): An assessment of reporting quality with a CONSORT- and STRICTA-based instrument                                                  | Review: research methodology discussions | Evidence-based Complementary and Alternative Medicine         | 4 |
| 2011 | He et al                    | Quality assessment of reporting of randomization, allocation concealment, and blinding in traditional chinese medicine RCTs: A review of 3159 RCTs identified from 260 systematic reviews | Review: research methodology discussions | Trials                                                        | 1 |
| 2011 | Hopton and MacPherson       | Assessing blinding in randomised controlled trials of acupuncture: Challenges and recommendations                                                                                         | Review: research methodology discussions | Chinese Journal of Integrative Medicine                       | 4 |
| 2011 | Jedel et al                 | Impact of electro-acupuncture and physical exercise on hyperandrogenism and oligo/amenorrhea in women with polycystic ovary syndrome: A randomized controlled trial                       | RCT                                      | American Journal of Physiology - Endocrinology and Metabolism | 2 |
| 2011 | Johnson and Bjordal         | Transcutaneous electrical nerve stimulation for the management of painful conditions: Focus on neuropathic pain                                                                           | Review                                   | Expert Review of Neurotherapeutics                            | 2 |
| 2011 | Kim et al                   | Acupuncture for premenstrual syndrome: A systematic review and meta-analysis of randomised controlled trials                                                                              | Review                                   | BJOG: An International Journal of Obstetrics and Gynaecology  | 2 |

|      |                         |                                                                                                                                                                                        |                                          |                                                               |   |
|------|-------------------------|----------------------------------------------------------------------------------------------------------------------------------------------------------------------------------------|------------------------------------------|---------------------------------------------------------------|---|
| 2011 | Kim et al               | Moxibustion for managing type 2 diabetes mellitus: A systematic review                                                                                                                 | Review                                   | Chinese Journal of Integrative Medicine                       | 4 |
| 2011 | Kim et al               | RE: Hemopericardium following acupuncture?                                                                                                                                             | Letter                                   | Yonsei Medical Journal                                        | 1 |
| 2011 | Knebel et al            | Double-blinded, randomized controlled trial comparing real versus placebo acupuncture to improve tolerance of diagnostic esophagogastroduodenoscopy without sedation: A study protocol | Protocol                                 | Trials                                                        | 1 |
| 2011 | Musil                   | The safety, acceptability, and effectiveness of acupuncture as an adjunctive treatment for acute symptoms in bipolar disorder (Article in German)                                      | Commentary                               | Deutsche Zeitschrift fur Akupunktur                           | 3 |
| 2011 | Norrbrink and Lundeborg | Acupuncture and massage therapy for neuropathic pain following spinal cord injury: An exploratory study                                                                                | Observational study                      | Acupuncture in Medicine                                       | 3 |
| 2011 | Paley and Johnson       | Acupuncture for cancer-induced bone pain: A pilot study                                                                                                                                | Observational study                      | Acupuncture in Medicine                                       | 3 |
| 2011 | Pastore et al           | True and sham acupuncture produced similar frequency of ovulation and improved LH to FSH ratios in women with polycystic ovary syndrome                                                | RCT                                      | Journal of Clinical Endocrinology and Metabolism              | 2 |
| 2011 | Price et al             | Getting inside acupuncture trials - Exploring intervention theory and rationale                                                                                                        | Review: research methodology discussions | BMC Complementary and Alternative Medicine                    | 4 |
| 2011 | Raja-Khan et al         | The physiological basis of complementary and alternative medicines for polycystic ovary syndrome                                                                                       | Review                                   | American Journal of Physiology - Endocrinology and Metabolism | 2 |
| 2011 | Robinson et al          | The evidence for Shiatsu: A systematic review of Shiatsu and acupressure                                                                                                               | Review                                   | BMC Complementary and Alternative Medicine                    | 4 |
| 2011 | Sarasà                  | Case report: Is acupuncture useful in the treatment of cluster headache? (Article in Spanish)                                                                                          | Case report                              | Revista Internacional de Acupuntura                           | 4 |
| 2011 | Skjeie et al            | A pilot study of ST36 acupuncture for infantile colic                                                                                                                                  | RCT                                      | Acupuncture in Medicine                                       | 3 |
| 2011 | Smith et al             | Development of an instrument to assess the quality of acupuncture: Results from a Delphi process                                                                                       | Guidelines related                       | Journal of Alternative and Complementary Medicine             | 3 |

|      |                               |                                                                                                                                |                                          |                                             |   |
|------|-------------------------------|--------------------------------------------------------------------------------------------------------------------------------|------------------------------------------|---------------------------------------------|---|
| 2011 | Stener-Victorin and Manheimer | Commentary on the Cochrane review of acupuncture and assisted conception                                                       | Commentary                               | Explore: The Journal of Science and Healing | 1 |
| 2011 | Stub et al                    | Acupuncture treatment for depression-A systematic review and meta-analysis                                                     | Review                                   | European Journal of Integrative Medicine    | 4 |
| 2011 | Vas                           | How to write a case report: A guide for authors (Article in Spanish)                                                           | Guidelines                               | Revista Internacional de Acupuntura         | 4 |
| 2011 | Witt                          | Clinical research on acupuncture - Concepts and guidance on efficacy and effectiveness research                                | Review: research methodology discussions | Chinese Journal of Integrative Medicine     | 4 |
| 2011 | Wong et al                    | Acupuncture for acute management and rehabilitation of traumatic brain injury                                                  | Review                                   | Cochrane Database of Systematic Reviews     | 1 |
| 2011 | Xu and Chen                   | Acupuncture: A paradigm of worldwide cross-cultural communication                                                              | Editorial                                | Chinese Journal of Integrative Medicine     | 4 |
| 2012 | Agbaje et al                  | Assessment of caries experience in epidemiological surveys: A review                                                           | Review: research methodology discussions | Community Dental Health                     | 2 |
| 2012 | Cao et al                     | An updated review of the efficacy of cupping therapy                                                                           | Review                                   | PLoS ONE                                    | 1 |
| 2012 | Chen et al                    | Assessing the quality of reports about randomized controlled trials of acupuncture treatment on diabetic peripheral neuropathy | Review: research methodology discussions | PLoS ONE                                    | 1 |
| 2012 | Collazo and Muñoz             | Prediction of variability in the response to acupuncture in patients with chronic pain (Article in Spanish)                    | Observational study                      | Revista Internacional de Acupuntura         | 4 |
| 2012 | Enblom et al                  | Acupuncture compared with placebo acupuncture in radiotherapy-induced nausea-A randomized controlled study                     | RCT                                      | Annals of Oncology                          | 2 |
| 2012 | Förster and Stange            | The CONSORT statement: The companion in pursuit of high quality phytotherapy research (Article in German)                      | Review: research methodology discussions | Zeitschrift fur Phytotherapie               | 2 |
| 2012 | Fragoso and Ferreira          | Immediate effects of acupuncture on biceps brachii muscle function in healthy and post-stroke subjects                         | RCT                                      | Chinese Medicine                            | 4 |

|      |                      |                                                                                                                                                                                                            |                     |                                                       |   |
|------|----------------------|------------------------------------------------------------------------------------------------------------------------------------------------------------------------------------------------------------|---------------------|-------------------------------------------------------|---|
| 2012 | Fragoso and Ferreira | Evaluation of the immediate effects of manual acupuncture on brachial bicep muscle function in healthy individuals and poststroke patients: A study protocol of a parallel-group randomized clinical trial | Protocol            | Journal of Chinese Integrative Medicine               | 3 |
| 2012 | Frisk et al          | Acupuncture improves health-related quality-of-life (HRQoL) and sleep in women with breast cancer and hot flushes                                                                                          | RCT                 | Supportive Care in Cancer                             | 2 |
| 2012 | Fuller et al         | Evaluating the impact and use of Transparent Reporting of Evaluations with Non-randomised Designs (TREND) reporting guidelines                                                                             | Protocol for review | BMJ Open                                              | 1 |
| 2012 | He et al             | Target points: A discussion on acupuncture treatment of primary trigeminal neuralgia                                                                                                                       | Review              | Journal of Chinese Integrative Medicine               | 3 |
| 2012 | Hehir and Williams   | A survey of health professionals' views about integration of Traditional Chinese Medicine (TCM) Acupuncture into NHS Scotland                                                                              | Survey              | European Journal of Integrative Medicine              | 4 |
| 2012 | Hinman et al         | Efficacy of acupuncture for chronic knee pain: protocol for a randomised controlled trial using a Zelen design                                                                                             | Protocol            | BMC Complementary and Alternative Medicine            | 4 |
| 2012 | Kim et al            | Cupping for treating neck pain in video display terminal (VDT) users: A randomized controlled pilot trial                                                                                                  | RCT                 | Journal of Occupational Health                        | 2 |
| 2012 | Kim et al            | Intramuscular stimulation therapy for healthcare: A systematic review of randomised controlled trials                                                                                                      | Review              | Acupuncture in Medicine                               | 3 |
| 2012 | Lægaard              | Akupunktur og forskning (Article in Danish)                                                                                                                                                                | Review              | Ugeskrift for Laeger                                  | 1 |
| 2012 | Lee et al            | The effectiveness of acupuncture research across components of the trauma spectrum response (tsr): A systematic review of reviews                                                                          | Review              | Systematic Reviews                                    | 1 |
| 2012 | Lee et al            | Validation study of Kim's Sham needle by measuring facial temperature: An N-of-1 randomized double-blind placebo-controlled clinical trial                                                                 | RCT                 | Evidence-based Complementary and Alternative Medicine | 4 |

|      |                     |                                                                                                                                                                    |                                          |                                              |   |
|------|---------------------|--------------------------------------------------------------------------------------------------------------------------------------------------------------------|------------------------------------------|----------------------------------------------|---|
| 2012 | Liang et al         | The optimized acupuncture treatment for neck pain caused by cervical spondylosis: a study protocol of a multicentre randomized controlled trial                    | Protocol                                 | Trials                                       | 1 |
| 2012 | Lu et al            | The feasibility and effects of acupuncture on quality of life scores during chemotherapy in ovarian cancer: Results from a pilot, randomized sham-controlled trial | RCT                                      | Medical Acupuncture                          | 3 |
| 2012 | Lu et al            | Acupuncture for dysphagia after chemoradiation in head and neck cancer: Rationale and design of a randomized, sham-controlled trial                                | Protocol                                 | Contemporary Clinical Trials                 | 1 |
| 2012 | Lyons et al         | Acupuncture and Chinese herbs as treatments for depression: An Australian pilot study                                                                              | Observational study                      | Complementary Therapies in Clinical Practice | 4 |
| 2012 | MacPherson et al    | Acupuncture for irritable bowel syndrome: Primary care based pragmatic randomised controlled trial                                                                 | RCT                                      | BMC Gastroenterology                         | 2 |
| 2012 | Manheimer et al     | Acupuncture for treatment of irritable bowel syndrome                                                                                                              | Review                                   | Cochrane Database of Systematic Reviews      | 1 |
| 2012 | Molassiotis et al   | Acupuncture for cancer-related fatigue in patients with breast cancer: A pragmatic randomized controlled trial                                                     | RCT                                      | Journal of Clinical Oncology                 | 2 |
| 2012 | Oravec and Mészáros | Traditional Chinese medicine: Theoretical background and its use in China (Article in Hungarian)                                                                   | Review                                   | Orvosi Hetilap                               | 1 |
| 2012 | Pandolfi            | The autumn of acupuncture                                                                                                                                          | Review                                   | European Journal of Internal Medicine        | 2 |
| 2012 | Park et al          | Effects of sweet bee venom pharmacopuncture treatment for chemotherapy-induced peripheral neuropathy: A case series                                                | Case series                              | Integrative Cancer Therapies                 | 2 |
| 2012 | Purepong et al      | External validity in randomised controlled trials of acupuncture for osteoarthritis knee pain                                                                      | Review: research methodology discussions | Acupuncture in Medicine                      | 3 |

|      |                        |                                                                                                                                                                  |                                          |                                                       |   |
|------|------------------------|------------------------------------------------------------------------------------------------------------------------------------------------------------------|------------------------------------------|-------------------------------------------------------|---|
| 2012 | Qu et al               | Does acupuncture improve the outcome of in vitro fertilization? Guidance for future trials                                                                       | Review: research methodology discussions | European Journal of Integrative Medicine              | 4 |
| 2012 | Serra                  | Good publication practice, its evolution and expected impact in public health                                                                                    | Review: research methodology discussions | Revista Cubana de Salud Publica                       | 2 |
| 2012 | Sherman                | Guidelines for developing yoga interventions for randomized trials                                                                                               | Review: research methodology discussions | Evidence-based Complementary and Alternative Medicine | 4 |
| 2012 | Shin et al             | Bee venom acupuncture for chronic low back pain: A randomised, sham-controlled, triple-blind clinical trial                                                      | RCT                                      | European Journal of Integrative Medicine              | 4 |
| 2012 | Smith et al            | Using a Delphi consensus process to develop an acupuncture treatment protocol by consensus for women undergoing Assisted Reproductive Technology (ART) treatment | Delphi study                             | BMC Complementary and Alternative Medicine            | 4 |
| 2012 | Stener-Victorin        | Reply of the authors                                                                                                                                             | Letter                                   | Fertility and Sterility                               | 2 |
| 2012 | Stuardi and MacPherson | Acupuncture for irritable bowel syndrome: Diagnosis and treatment of patients in a pragmatic trial                                                               | RCT related                              | Journal of Alternative and Complementary Medicine     | 3 |
| 2012 | Vixner et al           | Manual and electroacupuncture for labour pain: Study design of a longitudinal randomized controlled trial                                                        | RCT related                              | Evidence-based Complementary and Alternative Medicine | 4 |
| 2012 | Wang et al             | Scalp acupuncture for acute ischemic stroke: A meta-analysis of randomized controlled trials                                                                     | Review                                   | Evidence-based Complementary and Alternative Medicine | 4 |
| 2012 | Witt et al             | Effectiveness guidance document (EGD) for acupuncture research - a consensus document for conducting trials                                                      | Guidelines                               | BMC Complementary and Alternative Medicine            | 4 |
| 2012 | Witt et al             | How well do randomized trials inform decision making: Systematic review using comparative effectiveness research measures on acupuncture for back pain           | Review: research methodology discussions | PLoS ONE                                              | 1 |

|      |                      |                                                                                                                                                                                                  |                     |                                                                        |    |
|------|----------------------|--------------------------------------------------------------------------------------------------------------------------------------------------------------------------------------------------|---------------------|------------------------------------------------------------------------|----|
| 2012 | Wong et al           | Acupuncture for acute management and rehabilitation of traumatic brain injury                                                                                                                    | Review              | European Journal of Physical and Rehabilitation Medicine               | 2  |
| 2012 | Tao et al            | Randomized controlled trial comparing acupuncture with placebo acupuncture for the treatment of Carpal Tunnel Syndrome                                                                           | RCT                 | PM and R                                                               | 1  |
| 2012 | Zaslowski and Garvey | Have you got consent? An overview of human research ethics for east asian medicine                                                                                                               | Book chapter        | Publisher: Nova Science Publishers, Inc.                               | NA |
| 2012 | Zhou et al           | Acupuncture in treating hepatic fibrosis: A review with recommendation for future studies                                                                                                        | Review              | African Journal of Traditional Complementary and Alternative Medicines | 4  |
| 2012 | Zou et al            | Traditional chinese herbal medicines for treating HIV infections and AIDS                                                                                                                        | Review              | Evidence-based Complementary and Alternative Medicine                  | 4  |
| 2013 | Allam and Mohammed   | The role of scalp acupuncture for relieving the chronic pain of degenerative osteoarthritis: A pilot study of egyptian women                                                                     | Observational study | Medical Acupuncture                                                    | 3  |
| 2013 | Arvidsdotter et al   | Effects of an integrative treatment, therapeutic acupuncture and conventional treatment in alleviating psychological distress in primary care patients - a pragmatic randomized controlled trial | RCT                 | BMC Complementary and Alternative Medicine                             | 4  |
| 2013 | Barbour t al         | Better reporting of scientific studies: Why it matters                                                                                                                                           | Editorial           | PLoS Medicine                                                          | 3  |
| 2013 | Bosch et al          | Sleep ameliorating effects of acupuncture in a psychiatric population                                                                                                                            | RCT                 | Evidence-based Complementary and Alternative Medicine                  | 4  |
| 2013 | Cao et al            | Acupoint stimulation for fibromyalgia: A systematic review of randomized controlled trials                                                                                                       | Review              | Evidence-based Complementary and Alternative Medicine                  | 4  |
| 2013 | Chen et al           | Manual acupuncture for treatment of diabetic peripheral neuropathy: A systematic review of randomized controlled trials                                                                          | Review              | PLoS ONE                                                               | 1  |
| 2013 | Chen et al           | Effects of acupuncture treatment on depression insomnia: a study protocol of a multicenter randomized controlled trial                                                                           | Protocol            | Trial                                                                  | 1  |
| 2013 | Cheng et al          | Extending the CONSORT Statement to moxibustion                                                                                                                                                   | Guidelines          | Journal of Chinese Integrative Medicine                                | 3  |



|      |                    |                                                                                                                                           |                                          |                                                               |   |
|------|--------------------|-------------------------------------------------------------------------------------------------------------------------------------------|------------------------------------------|---------------------------------------------------------------|---|
| 2013 | Cheong et al       | The effectiveness of acupuncture in prevention and treatment of postoperative nausea and vomiting - A systematic review and meta-analysis | Review                                   | PLoS ONE                                                      | 1 |
| 2013 | Cheong et al       | Acupuncture and assisted reproductive technology                                                                                          | Review                                   | Cochrane Database of Systematic Reviews                       | 1 |
| 2013 | Cho et al          | Acupuncture for chronic low back pain: A multicenter, randomized, patient-assessor blind, sham-controlled clinical trial                  | RCT                                      | Spine                                                         | 2 |
| 2013 | Da Silva et al     | Integrative medicine, integrative acupuncture                                                                                             | Editorial                                | European Journal of Integrative Medicine                      | 4 |
| 2013 | D'Alessandro et al | Evaluation of acupuncture for Cancer symptoms in a Cancer Institute in Brazil                                                             | Observational study                      | Acupuncture in Medicine                                       | 3 |
| 2013 | Deare              | Reflections on undertaking the Cochrane review: 'Acupuncture for treating Fibromyalgia'                                                   | Commentary                               | Australian Journal of Acupuncture and Chinese Medicine        | 3 |
| 2013 | Facco et al        | Acupuncture versus valproic acid in the prophylaxis of migraine without aura: A prospective controlled study                              | RCT                                      | Minerva Anestesiologica                                       | 2 |
| 2013 | Ferreira et al     | Laser acupuncture in patients with temporomandibular dysfunction: A randomized controlled trial                                           | RCT                                      | Lasers in Medical Science                                     | 2 |
| 2013 | Gu et al           | Registration quality assessment of acupuncture clinical trials                                                                            | Review: research methodology discussions | PLoS ONE                                                      | 1 |
| 2013 | Heo et al          | Acupuncture for spinal cord injury and its complications: A systematic review and meta-analysis of randomized controlled trials           | Review                                   | Evidence-based Complementary and Alternative Medicine         | 4 |
| 2013 | Jiao et al         | Review of Cochrane reviews on acupuncture: How Chinese resources contribute to Cochrane Reviews                                           | Review: research methodology discussions | Journal of Alternative and Complementary Medicine             | 3 |
| 2013 | Johansson et al    | Acupuncture for ovulation induction in polycystic ovary syndrome: A randomized controlled trial                                           | RCT                                      | American Journal of Physiology - Endocrinology and Metabolism | 2 |

|      |                   |                                                                                                                                      |                                          |                                                       |          |
|------|-------------------|--------------------------------------------------------------------------------------------------------------------------------------|------------------------------------------|-------------------------------------------------------|----------|
| 2013 | Kay Garcia et al  | Systematic review of acupuncture in cancer care: A synthesis of the evidence                                                         | Review                                   | Journal of Clinical Oncology                          | 2        |
| 2013 | Kim et al         | Use of acupuncture for pain management in an academic Korean medicine hospital: A retrospective review of electronic medical records | Review                                   | Acupuncture in Medicine                               | 3        |
| 2013 | Kim et al         | The role of acupuncture in emergency department settings: A systematic review                                                        | Review                                   | Complementary Therapies in Medicine                   | 3 (2002) |
| 2013 | Kim et al         | Acupuncture for posttraumatic stress disorder: A systematic review of randomized controlled trials and prospective clinical trials   | Review                                   | Evidence-based Complementary and Alternative Medicine | 4        |
| 2013 | Kinser and Robins | Control group design: Enhancing rigor in research of mind-body therapies for depression                                              | Review: research methodology discussions | Evidence-based Complementary and Alternative Medicine | 4        |
| 2013 | Kuang et al       | Acupuncture and clomiphene citrate for live birth in polycystic ovary syndrome: Study design of a randomized controlled trial        | Protocol                                 | Evidence-based Complementary and Alternative Medicine | 4        |
| 2013 | Landgren          | Acupuncture in practice: Investigating acupuncturists' approach to treating infantile colic                                          | Survey                                   | Evidence-based Complementary and Alternative Medicine | 4        |
| 2013 | Lee et al         | Scalp acupuncture for Parkinson's disease: A systematic review of randomized controlled trials                                       | Review                                   | Chinese Journal of Integrative Medicine               | 4        |
| 2013 | Lee et al         | Acupuncture for acute low back pain: A systematic review                                                                             | Review                                   | Clinical Journal of Pain                              | 2        |
| 2013 | Lee et al         | Moxibustion for treating knee osteoarthritis: Study protocol of a multicentre randomised controlled trial                            | Protocol                                 | BMC Complementary and Alternative Medicine            | 4        |
| 2013 | Lee et al         | Scalp acupuncture for stroke recovery: A systematic review and meta-analysis of randomized controlled trials                         | Review                                   | European Journal of Integrative Medicine              | 4        |
| 2013 | Lee et al         | Acupuncture for gouty arthritis: A concise report of a systematic and meta-analysis approach                                         | Review                                   | Rheumatology                                          | 2        |
| 2013 | Liang et al       | Deqi sensation in placebo acupuncture: A crossover study on chinese medicine students                                                | RCT                                      | Evidence-based Complementary and Alternative Medicine | 4        |

|      |                      |                                                                                                                                                                                                                                    |                                          |                                                       |   |
|------|----------------------|------------------------------------------------------------------------------------------------------------------------------------------------------------------------------------------------------------------------------------|------------------------------------------|-------------------------------------------------------|---|
| 2013 | Lu et al             | Quality of reporting and its correlates among randomized controlled trials on acupuncture for cancer pain: Application of the CONSORT 2010 Statement and STRICTA                                                                   | Review: research methodology discussions | Expert Review of Anticancer Therapy                   | 2 |
| 2013 | Macpherson et al     | Acupuncture for depression: Patterns of diagnosis and treatment within a randomised controlled trial                                                                                                                               | RCT related                              | Evidence-based Complementary and Alternative Medicine | 4 |
| 2013 | Marx et al           | AcuTrials®: An online database of randomized controlled trials and systematic reviews of acupuncture                                                                                                                               | Recommendations                          | BMC Complementary and Alternative Medicine            | 4 |
| 2013 | McLay et al          | Research methodology for the study of complementary and alternative medicine in the treatment of military PTSD                                                                                                                     | Review: research methodology discussions | Psychiatric Annals                                    | 2 |
| 2013 | Molassiotis et al    | A randomized, controlled trial of acupuncture self-needling as maintenance therapy for cancer-related fatigue after therapist-delivered acupuncture                                                                                | RCT                                      | Annals of Oncology                                    | 2 |
| 2013 | Nedeljković et al    | Modalities of acupuncture treatments in assisted reproductive technology - A comparison of treatment practice in Swiss, German, and Austrian fertility centers with findings from randomized controlled trials (Article in German) | Survey                                   | Forschende Komplementarmedizin                        | 4 |
| 2013 | Oh et al             | Acupuncture for treatment of arthralgia secondary to aromatase inhibitor therapy in women with early breast cancer: Pilot study                                                                                                    | RCT                                      | Acupuncture in Medicine                               | 3 |
| 2013 | O'Leary and Crawford | Review article: Reporting guidelines in the biomedical literature                                                                                                                                                                  | Review: research methodology discussions | Canadian Journal of Anesthesia                        | 2 |
| 2013 | Park et al           | Acupuncture for ankle sprain: Systematic review and meta-analysis                                                                                                                                                                  | Review                                   | BMC Complementary and Alternative Medicine            | 4 |
| 2013 | Park et al           | Moxibustion in the management of irritable bowel syndrome: Systematic review and meta-analysis                                                                                                                                     | Review                                   | BMC Complementary and Alternative Medicine            | 4 |

|      |                       |                                                                                                                                                                        |                                          |                                            |   |
|------|-----------------------|------------------------------------------------------------------------------------------------------------------------------------------------------------------------|------------------------------------------|--------------------------------------------|---|
| 2013 | Rashidi et al         | Effects of acupuncture on the outcome of in vitro fertilisation and intracytoplasmic sperm injection in women with polycystic ovarian syndrome                         | RCT                                      | Acupuncture in Medicine                    | 3 |
| 2013 | Rivers and Zollman    | Reliability of surface acupuncture point location                                                                                                                      | Observational study                      | Medical Acupuncture                        | 3 |
| 2013 | Sardella et al        | Acupuncture and burning mouth syndrome: A pilot study                                                                                                                  | Observational study                      | Pain Practice                              | 2 |
| 2013 | Simcock et al         | Arix: A randomised trial of acupuncture V oral care sessions in patients with chronic xerostomia following treatment of head and neck cancer                           | RCT                                      | Annals of Oncology                         | 2 |
| 2013 | Skjeie and Gardasevic | Medical acupuncture modality: Principles, explanatory model, and scientific developments during 2005-2012                                                              | Review                                   | Journal of Acupuncture and Tuina Science   | 4 |
| 2013 | Smith et al           | The effect of acupuncture on post-cancer fatigue and well-being for women recovering from breast cancer: A pilot randomised controlled trial                           | RCT                                      | Acupuncture in Medicine                    | 3 |
| 2013 | Towler et al          | What is the evidence for the use of acupuncture as an intervention for symptom management in cancer supportive and palliative care: An integrative overview of reviews | Review                                   | Supportive Care in Cancer                  | 2 |
| 2013 | Turner et al          | An evaluation of epidemiological and reporting characteristics of Complementary and Alternative Medicine (CAM) systematic reviews (SRs)                                | Review: research methodology discussions | PLoS ONE                                   | 1 |
| 2013 | Wong et al            | Acupuncture for acute management and rehabilitation of traumatic brain injury                                                                                          | Review                                   | Cochrane Database of Systematic Reviews    | 1 |
| 2013 | Xu et al              | Acupuncture for chronic low back pain in long-term follow-up: A meta-analysis of 13 randomized controlled trials                                                       | Review                                   | American Journal of Chinese Medicine       | 4 |
| 2013 | Xu et al              | Effect of acupuncture treatment for weight loss on gut flora in patients with simple obesity                                                                           | Letter                                   | Acupuncture in Medicine                    | 3 |
| 2013 | Yang et al            | Meta-analysis of acupuncture for relieving non-organic dyspeptic symptoms suggestive of diabetic gastroparesis                                                         | Review                                   | BMC Complementary and Alternative Medicine | 4 |

|      |                 |                                                                                                                                                                                                  |                                          |                                                       |   |
|------|-----------------|--------------------------------------------------------------------------------------------------------------------------------------------------------------------------------------------------|------------------------------------------|-------------------------------------------------------|---|
| 2013 | Yang et al      | Factors contributing to de Qi in acupuncture randomized clinical trials                                                                                                                          | Review                                   | Evidence-based Complementary and Alternative Medicine | 4 |
| 2013 | Yun et al       | Effect of facial cosmetic acupuncture on facial elasticity: An open-label, single-arm pilot study                                                                                                | Observational study                      | Evidence-based Complementary and Alternative Medicine | 4 |
| 2013 | Zhang et al     | Ear acupressure for smoking cessation: Study protocol for a randomised controlled trial                                                                                                          | Protocol                                 | Forschende Komplementarmedizin                        | 4 |
| 2013 | Zhang et al     | Clinical research of traditional Chinese medicine needs to develop its own system of core outcome sets                                                                                           | Review: research methodology discussions | Evidence-based Complementary and Alternative Medicine | 4 |
| 2014 | Abe et al       | Acupuncture for treating persistent pain in Brazilian para-athletes                                                                                                                              | Observational study                      | Medical Acupuncture                                   | 3 |
| 2014 | Alraek          | Designing clinical studies that take into account traditional East Asian medicine's systems and methods - With focus on pattern identification                                                   | Review: research methodology discussions | Chinese Journal of Integrative Medicine               | 4 |
| 2014 | Alraek          | Just to be sure                                                                                                                                                                                  | Letter                                   | Acupuncture in Medicine                               | 3 |
| 2014 | Anderson et al  | Faculty survey to assess research literacy and evidence-informed practice interest and support at Pacific College of Oriental Medicine                                                           | Survey                                   | Journal of Alternative and Complementary Medicine     | 3 |
| 2014 | Appleyard et al | Should systematic reviews assess the risk of bias from sham-placebo acupuncture control procedures?                                                                                              | Review: research methodology discussions | European Journal of Integrative Medicine              | 4 |
| 2014 | Bae et al       | Efficacy of acupuncture in reducing preoperative anxiety: A meta-analysis                                                                                                                        | Review                                   | Evidence-based Complementary and Alternative Medicine | 4 |
| 2014 | Baeumler et al  | Effects of acupuncture on sensory perception: A systematic review and meta-analysis                                                                                                              | Review                                   | PLoS ONE                                              | 1 |
| 2014 | Cho et al       | Acupuncture with non-steroidal anti-inflammatory drugs (NSAIDs) versus acupuncture or NSAIDs alone for the treatment of chronic neck pain: An assessor-blinded randomised controlled pilot study | RCT                                      | Acupuncture in Medicine                               | 3 |
| 2014 | Choi et al      | Acupuncture for the treatment of chronic obstructive pulmonary disease: A protocol of a systematic review                                                                                        | Protocol for review                      | BMJ Open                                              | 1 |

|      |                           |                                                                                                                                                                                                                     |                                          |                                                   |   |
|------|---------------------------|---------------------------------------------------------------------------------------------------------------------------------------------------------------------------------------------------------------------|------------------------------------------|---------------------------------------------------|---|
| 2014 | Choi et al                | Endorsement for improving the quality of reports on randomized controlled trials of traditional medicine journals in Korea: A systematic review                                                                     | Review: research methodology discussions | Trials                                            | 1 |
| 2014 | Cooke et al               | PC6 acupoint stimulation for the prevention of postcardiac surgery nausea and vomiting: A protocol for a two-group, parallel, superiority randomised clinical trial                                                 | Protocol                                 | BMJ Open                                          | 1 |
| 2014 | Crawford et al            | The current state of the science for active self-care Complementary and Integrative Medicine therapies in the management of chronic pain symptoms: Lessons learned, directions for the future                       | Review: research methodology discussions | Pain Medicine                                     | 2 |
| 2014 | Gadua et al               | Acupuncture and moxibustion for lateral elbow pain: A systematic review of randomized controlled trials                                                                                                             | Review                                   | BMC Complementary and Alternative Medicine        | 4 |
| 2014 | Garrow et al              | Role of acupuncture in the management of diabetic painful neuropathy (DPN): A pilot RCT                                                                                                                             | RCT                                      | Acupuncture in Medicine                           | 3 |
| 2014 | Glickman-Simon and Lepper | Panax Ginseng for psychomotor performance and cognition, Spinal manipulation for Lumbar Disk Herniation, Ginger for Migraines, Music therapy for mental illness, and acupuncture for Diabetic Peripheral Neuropathy | General article: expert opinion          | Explore- The Journal of Science and Healing       | 4 |
| 2014 | Haddad and Palesh         | Acupuncture in the treatment of cancer-related psychological symptoms                                                                                                                                               | Review                                   | Integrative Cancer Therapies                      | 2 |
| 2014 | Hadianfard et al          | Efficacy of acupuncture versus local Methylprednisolone Acetate injection in De Quervain's Tenosynovitis: A randomized controlled trial                                                                             | RCT                                      | Journal of Acupuncture and Meridian Studies       | 4 |
| 2014 | Hammerschlag et al        | Nontouch biofield therapy: A systematic review of human randomized controlled trials reporting use of only nonphysical contact treatment                                                                            | Review                                   | Journal of Alternative and Complementary Medicine | 3 |

|      |                |                                                                                                                                                                                                                   |                                          |                                                   |   |
|------|----------------|-------------------------------------------------------------------------------------------------------------------------------------------------------------------------------------------------------------------|------------------------------------------|---------------------------------------------------|---|
| 2014 | Han et al      | Acupuncture for functional dyspepsia: Study protocol for a two-center, randomized controlled trial                                                                                                                | Protocol                                 | Trials                                            | 1 |
| 2014 | Han et al      | Effect of acupuncture on patients with insomnia: Study protocol for a randomized controlled trial                                                                                                                 | Protocol                                 | Trials                                            | 1 |
| 2014 | Hasegawa et al | Acupuncture for acute non-specific low back pain: a randomised, controlled, double-blind, placebo trial                                                                                                           | RCT                                      | Acupuncture in Medicine                           | 3 |
| 2014 | Hinman et al   | Acupuncture for chronic knee pain: A randomized clinical trial                                                                                                                                                    | RCT                                      | Journal of the American Medical Association       | 1 |
| 2014 | Hoffmann et al | Better reporting of interventions: Template for intervention description and replication (TIDieR) checklist and guide                                                                                             | Guidelines                               | BMJ (Online)                                      | 1 |
| 2014 | Im et al       | Effects of acupuncture at GB20 on CO <sub>2</sub> reactivity in the Basilar and Middle Cerebral Arteries during Hypocapnia in healthy participants                                                                | Observational study                      | Journal of Alternative and Complementary Medicine | 3 |
| 2014 | Jerng et al    | The effectiveness and safety of acupuncture for poor semen quality in infertile males: A systematic review and meta-analysis                                                                                      | Review                                   | Asian Journal of Andrology                        | 2 |
| 2014 | Kearney        | Hoping for a TREND toward PRISMA: The variety and value of research reporting guidelines                                                                                                                          | Editorial                                | Research in Nursing and Health                    | 2 |
| 2014 | Kim et al      | Acupuncture as analgesia for non-emergent acute non-specific neck pain, ankle sprain and primary headache in an emergency department setting: A protocol for a parallel group, randomised, controlled pilot trial | Protocol                                 | BMJ Open                                          | 1 |
| 2014 | Kim et al      | Assessment of the quality of reporting for treatment components in Cochrane reviews of acupuncture                                                                                                                | Review: research methodology discussions | BMJ Open                                          | 1 |
| 2014 | Kim et al      | Assessment of the quality of reporting in randomised controlled trials of acupuncture in the Korean literature using the CONSORT statement and STRICTA guidelines                                                 | Review: research methodology discussions | BMJ Open                                          | 1 |

|      |                                  |                                                                                                                                                                                       |                                          |                                                       |   |
|------|----------------------------------|---------------------------------------------------------------------------------------------------------------------------------------------------------------------------------------|------------------------------------------|-------------------------------------------------------|---|
| 2014 | Kim and Kang                     | Rebuttal to "Life-threatening cardiac tamponade: a rare complication of acupuncture": Who framed acupuncture?                                                                         | Letter                                   | Journal of Cardiothoracic Surgery                     | 2 |
| 2014 | Lee et al                        | Acupuncture for postoperative pain in laparoscopic surgery: A systematic review protocol                                                                                              | Protocol for review                      | BMJ Open                                              | 1 |
| 2014 | Legro et al                      | Improving the reporting of clinical trials of Infertility treatment (IMPRINT): Explanation and elaboration of the modification of the CONSORT statement                               | Guidelines                               | Fertility and Sterility                               | 2 |
| 2014 | Legro et al                      | Improving the reporting of clinical trials of Infertility treatments (IMPRINT): Modifying the CONSORT statement                                                                       | Guidelines related                       | Fertility and Sterility                               | 2 |
| 2014 | Legro et al                      | Improving the reporting of clinical trials of Infertility treatments (IMPRINT): Modifying the CONSORT statement                                                                       | Guidelines related                       | Human Reproduction                                    | 2 |
| 2014 | Luo et al                        | Quality of reporting of randomised controlled trials of acupuncture for neurological diseases conducted in China                                                                      | Review: research methodology discussions | Acupuncture in Medicine                               | 3 |
| 2014 | Mandiroglu et al                 | Acupuncture for neuropathic pain due to bortezomib in a patient with multiple myeloma                                                                                                 | Case report                              | Acupuncture in Medicine                               | 3 |
| 2014 | Martins et al                    | Factors influencing further acupuncture usage and a more positive outcome in patients with Osteoarthritis of the knee and the hip: A 3-year follow-up of a randomized pragmatic trial | RCT                                      | Clinical Journal of Pain                              | 2 |
| 2014 | Miller et al                     | Benefits of acupuncture for diabetic gastroparesis: a comparative preliminary study                                                                                                   | Observational study                      | Acupuncture in Medicine                               | 3 |
| 2014 | Moon et al                       | Acupuncture for treating whiplash associated disorder: A systematic review of randomised clinical trials                                                                              | Review                                   | Evidence-based Complementary and Alternative Medicine | 4 |
| 2014 | Moreno-Martín and Santana-Pineda | Is acupuncture effective in treatment for cervicobrachial chronic pain? Qualitative analysis of the literature (Article in Spanish)                                                   | Review                                   | Revista Internacional de Acupuntura                   | 4 |



|      |                 |                                                                                                                                                        |                                          |                                            |          |
|------|-----------------|--------------------------------------------------------------------------------------------------------------------------------------------------------|------------------------------------------|--------------------------------------------|----------|
| 2014 | Nandi et al     | Acupuncture in IVF: A review of current literature                                                                                                     | Review                                   | Journal of Obstetrics and Gynaecology      | 2        |
| 2014 | Ong and Claydon | The effect of dry needling for myofascial trigger points in the neck and shoulders: A systematic review and meta-analysis                              | Review                                   | Journal of Bodywork and Movement Therapies | 1        |
| 2014 | Park et al      | The safety of acupuncture during pregnancy: A systematic review                                                                                        | Review                                   | Acupuncture in Medicine                    | 3        |
| 2014 | Phillips et al  | A systematic review of how studies describe educational interventions for evidence-based practice: Stage 1 of the development of a reporting guideline | Review: research methodology discussions | BMC Medical Education                      | 2        |
| 2014 | Pirotta et al   | Acupuncture for menopausal vasomotor symptoms: Study protocol for a randomised controlled trial                                                        | Protocol                                 | Trials                                     | 1        |
| 2014 | Seo et al       | Bee venom acupuncture, NSAIDs or combined treatment for chronic neck pain: Study protocol for a randomized, assessor-blind trial                       | Protocol                                 | Trials                                     | 1        |
| 2014 | Stevens et al   | Relation of completeness of reporting of health research to journals' endorsement of reporting guidelines: Systematic review                           | Review: research methodology discussions | BMJ                                        | 1        |
| 2014 | Vixner et al    | Acupuncture with manual and electrical stimulation for labour pain: A longitudinal randomised controlled trial                                         | RCT                                      | BMC Complementary and Alternative Medicine | 4        |
| 2014 | Wang et al      | Comparison of clinical effectiveness of acupuncture and a western drug on allergic rhinitis: Study protocol for a randomized controlled trial          | Protocol                                 | Journal of Traditional Chinese Medicine    | 4        |
| 2014 | Ward et al      | Components and reporting of yoga interventions for musculoskeletal conditions: A systematic review of randomised controlled trials                     | Review: research methodology discussions | Complementary Therapies in Medicine        | 3 (2002) |
| 2014 | Witt et al      | Effectiveness guidance document (EGD) for Chinese medicine trials: A consensus document                                                                | Guidelines                               | Trials                                     | 1        |

|                                                                        |               |                                                                                                                                                    |                                          |                                                                   |    |
|------------------------------------------------------------------------|---------------|----------------------------------------------------------------------------------------------------------------------------------------------------|------------------------------------------|-------------------------------------------------------------------|----|
| 2014                                                                   | Yeo et al     | Acupuncture on GB34 activates the precentral gyrus and prefrontal cortex in Parkinson's disease                                                    | Observational study                      | BMC Complementary and Alternative Medicine                        | 4  |
| 2014                                                                   | Yeo et al     | Randomised clinical trial of five ear acupuncture points for the treatment of overweight people                                                    | RCT                                      | Acupuncture in Medicine                                           | 3  |
| 2014                                                                   | Young         | Acupuncture and moxibustion may increase pregnancy rates in IVF after embryo implantation failure                                                  | General article: expert opinion          | Integrative Medicine Alert                                        | 4  |
| 2014                                                                   | Yu et al      | Quality assessment of randomized controlled trials reporting on knee osteoarthritis treated with warming needle moxibustion                        | Review: research methodology discussions | Journal of Traditional Chinese Medicine                           | 4  |
| 2014                                                                   | Zhang et al   | Sham control methods used in ear-acupuncture/ear-acupressure randomized controlled trials: A systematic review                                     | Review                                   | Journal of Alternative and Complementary Medicine                 | 3  |
| 2014                                                                   | Zhuang et al  | Quality of reporting on randomized controlled trials of acupuncture for stroke rehabilitation                                                      | Review: research methodology discussions | BMC Complementary and Alternative Medicine                        | 4  |
| 2014                                                                   | Zorzela et al | Quality of reporting in systematic reviews of adverse events: Systematic review                                                                    | Review: research methodology discussions | BMJ (Online)                                                      | 1  |
| <i>From Chinese database (China National Knowledge Infrastructure)</i> |               |                                                                                                                                                    |                                          |                                                                   |    |
| 2011                                                                   | Tang et al    | Acupuncture and guasha for stiff neck: A randomized controlled trial                                                                               | RCT                                      | Jilin Journal of Traditional Chinese Medicine                     | 4  |
| 2011                                                                   | Fan           | The literature evaluation and clinical research of treating depression with acupuncture and moxibustion                                            | RCT, Review                              | Doctoral dissertation in Guangzhou University of Chinese Medicine | NA |
| 2011                                                                   | Qu            | The evaluating quality research of randomized controlled trials literature on acupuncture and moxibustion on treating Scapulohumeral Periarthritis | Review: research methodology discussions | Master thesis in China Academy of Chinese Medical Sciences        | NA |
| 2012                                                                   | Lin and Wu    | Deconstruction of the clinical research model for acupuncture effects                                                                              | General article: expert opinion          | Chinese Acupuncture and Moxibustion                               | 4  |

|      |                |                                                                                                                                                   |                                               |                                                                     |    |
|------|----------------|---------------------------------------------------------------------------------------------------------------------------------------------------|-----------------------------------------------|---------------------------------------------------------------------|----|
| 2012 | He et al       | Target points: A discussion on acupuncture treatment of primary trigeminal neuralgia                                                              | General article: expert opinion               | Journal of Chinese Integrative Medicine                             | 3  |
| 2012 | Wang and Liang | Thoughts and prospects of research on acupoints compatibility                                                                                     | General article: expert opinion               | Chinese Acupuncture and Moxibustion                                 | 4  |
| 2012 | Zhang et al    | Assessing the reporting quality of randomized controlled trials on acupuncture for Diabetic Gastroparesis using the CONSORT statement and STRICTA | Review: research methodology discussions      | Tianjin Journal of Traditional Chinese Medicine                     | 4  |
| 2012 | Zhang et al    | Methodological quality of randomized controlled trials of acupuncture for sudden hearing loss                                                     | Review: research methodology discussions      | Shanghai Journal of Acupuncture and Moxibustion                     | 4  |
| 2012 | Liu            | Research on the quality of systematic reviews and randomized controlled trials of acupuncture and cognition of reporting guideline                | Review: research methodology discussions      | Doctoral dissertation in Lanzhou University                         | NA |
| 2012 | Liu            | Lower extremity point acupuncture treatment of periarthritis of shoulder with shoulder movement clinical curative effect observation              | RCT                                           | Master thesis in Heilongjiang University of Chinese Medicine        | NA |
| 2012 | Shi            | An evaluation research of literature and clinical trial with the Back-Shu and Front-Mu acupoints of Stomach for treating Diabetic Gastroparesis   | RCT, Review: research methodology discussions | Master thesis in Chengdu University of Traditional Chinese Medicine | NA |
| 2012 | Zhang          | Research of clinic guide of Chinese Medicine for Nutritional Iron Deficiency Anemia                                                               | Guidelines related                            | Master thesis in Nanjing University of Chinese Medicine             | NA |
| 2013 | Liu et al      | Quality improvement on acupuncture intervention report: Application and perfection of STRICTA                                                     | Commentary                                    | Chinese Acupuncture and Moxibustion                                 | 4  |
| 2013 | Qu et al       | Quality of reporting on randomized controlled trials of acupuncture for Scapulohumeral Periarthritis: A survey                                    | Survey                                        | Chinese Journal of Basic Medicine in Traditional Chinese Medicine   | 4  |
| 2013 | Shen et al     | Quality evaluation of the randomized controlled trials on acupuncture-moxibustion for Primary Trigeminal Neuralgia by using CONSORT and STRICTA   | Review: research methodology discussions      | Shanghai Journal of Acupuncture and Moxibustion                     | 4  |

|                                                                                                                                                                                                                                                                       |               |                                                                                                                                                               |                                          |                                                                       |    |
|-----------------------------------------------------------------------------------------------------------------------------------------------------------------------------------------------------------------------------------------------------------------------|---------------|---------------------------------------------------------------------------------------------------------------------------------------------------------------|------------------------------------------|-----------------------------------------------------------------------|----|
| 2013                                                                                                                                                                                                                                                                  | Wang and Zhao | Quality of research report in China according to the STRICTA of 2010 edition-Examples of RCT reports from acupuncture trials for insomnia in recent two years | Review: research methodology discussions | Journal of Clinical Acupuncture and Moxibustion                       | 4  |
| 2013                                                                                                                                                                                                                                                                  | Xu et al      | Assessment of reporting quality of randomized controlled trials on acupuncture for Shoulder-hand Syndrome with CONSORT statement and STRICTA                  | Review: research methodology discussions | Liaoning Journal of Traditional Chinese Medicine                      | 4  |
| 2013                                                                                                                                                                                                                                                                  | Zhang         | Clinical study on the Postherpetic Neuralgia with round acupuncture and its effect on IL-6                                                                    | RCT                                      | Master thesis in Nanjing University of Chinese Medicine               | NA |
| 2013                                                                                                                                                                                                                                                                  | Zhang         | A systematic review and the GRADE of acupuncture and moxibustion treatment for sudden hearing loss                                                            | Review                                   | Master thesis in Nanjing University of Chinese Medicine               | NA |
| 2014                                                                                                                                                                                                                                                                  | Jiang et al   | Assessment of reporting quality of randomized controlled trials on acupuncture for Leukocytopenia with CONSORT statement and STRICTA                          | Review: research methodology discussions | Modern Journal of Integrated Traditional Chinese and Western Medicine | 4  |
| 2014                                                                                                                                                                                                                                                                  | Liu et al     | Study on the normative statements elements of randomized controlled trial literature on ulcerative colitis treated by acupuncture and moxibustion             | Review: research methodology discussions | China Journal of Traditional Chinese Medicine and Pharmacy            | 4  |
| <i>From Japanese database (Japan Science and Technology Information Aggregator, Electronic)</i>                                                                                                                                                                       |               |                                                                                                                                                               |                                          |                                                                       |    |
| 2012                                                                                                                                                                                                                                                                  | Kim et al     | Cupping for treating neck pain in video display terminal (VDT) users: A randomized controlled pilot trial                                                     | RCT                                      | Journal of Occupational Health                                        | 2  |
| <p>Journal types:</p> <ol style="list-style-type: none"> <li>1. General medical non-CAM journals;</li> <li>2. Specialty medical non-CAM journals;</li> <li>3. CAM journals with STRICTA endorsement;</li> <li>4. CAM journals without STRICTA endorsement.</li> </ol> |               |                                                                                                                                                               |                                          |                                                                       |    |
